# Supplementary material for: A meta-analysis of particle water uptake reconciliation studies
Source: Copernicus journal article supplement (doi:10.5194/acp-14-11833-2014), 2014-11-11
Supplement: Supplementary file 9 [file acp-14-11833-2014-supplement.zip]

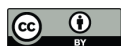

## *Supplement of*

# **A meta-analysis of particle water uptake reconciliation studies**

**J. D. Whitehead et al.**

*Correspondence to:* G. McFiggans ([g.mcfiggans@manchester.ac.uk](mailto:g.mcfiggans@manchester.ac.uk))

- Supplement-Cover-Letter.pdf
- Amazonia\_supp.pdf
- Borneo\_supp.pdf
- Chilbolton\_supp.pdf
- Discovery\_supp.pdf
- Figures\_S1\_S2.pdf
- Hornisgrinde\_supp.pdf
- London\_Summer\_supp.pdf
- London\_Winter\_supp.pdf
- MaceHead\_Summer\_supp.pdf
- MaceHead\_Winter\_supp.pdf
- Weybourne\_supp.pdf
- Whitehead\_ACPDsupp\_readme.pdf
- Whitehead\_ACPDsupp\_readme.tex
