# Supplementary material for: A meta-analysis of particle water uptake reconciliation studies
Source: Copernicus journal article supplement (doi:10.5194/acp-14-11833-2014), 2014-11-11
Supplement: Supplementary file 12 [file acp-14-11833-2014-supplement.zip]

# Supplementary material for A meta-analysis of particle water uptake reconciliation studies

J.D. Whitehead<sup>1</sup>, M. Irwin<sup>1,2</sup>, J.D. Allan<sup>1</sup>, N. Good<sup>1,3</sup>, and G.  
McFiggans<sup>1</sup>

<sup>1</sup>Centre for Atmospheric Science, SEAES, University of  
Manchester, Oxford Road, Manchester, M13 9PL, UK.

<sup>2</sup>now at Department of Earth and Planetary Science, Graduate  
School of Science, The University of Tokyo, Tokyo, Japan

<sup>3</sup>now at Department of Environmental & Radiological Health  
Sciences, Colorado State University, Fort Collins, Colorado, USA

## Introduction

The file Figures\_S1\_S2.pdf shows the figures S1 and S2, referred to in the text.

The rest of the pdf files in the supplementary material show  $N_{CCN}$  and time-series data for each of the datasets used in this study.

The first page of each pdf file shows box and whisker plots of  $N_{CCN}$  as a function of supersaturation, derived using the following methods:

- M1 Polydisperse  $N_{CCN}$  (if available)
- M2  $N_{CCN}$  integrated from the CCN size distribution
- M3  $N_{CCN}$  derived using threshold diameter as a cut-off in the particle size distribution
- M4 as M3 using average threshold diameter
- M5 as M3 using average size distribution
- M6 as M3 using average threshold diameter and size distribution
- M7  $N_{CCN}$  derived from  $\kappa_{GF}$
- M8 as M7 using average  $\kappa_{GF}$
- M9 as M7 using average size distribution

At each supersaturation, the boxes represent the median and interquartile range and the whiskers show the 10th and 90th percentile range. The filled black circles show mean values and small grey crosses show individual points.

The second page of each pdf file shows the time-series of the data products from each instrument. The top three panels are from the CCNc and are sep-

arated by supersaturation. From the top they are threshold diameter,  $N_{CCN}$  derived using the threshold diameter (M3), and  $\kappa$  derived from the threshold diameter. The next panel is  $\kappa$  derived from the mean growth factor from the HTDMA, and is separated by dry diameter. In the bottom panel,  $\kappa_{GF}$  has been recalculated for each supersaturation, and subtracted from  $\kappa_{D_{50}}$ .

The third page of each pdf file shows the time-series of the normalised  $GF$  distribution derived from the HTDMA data for each dry size. The red traces on these image plots show the mean  $GF$ . These data have been corrected to depict the  $GF$  at 90% RH.

The files are:

1. Figures\_S1\_S2.pdf
2. Amazonia\_supp.pdf
3. Borneo\_supp.pdf
4. Chilbolton\_supp.pdf
5. Discovery\_supp.pdf
6. Hornisgrinde\_supp.pdf
7. London\_Summer\_supp.pdf
8. London\_Winter\_supp.pdf
9. MaceHead\_Summer\_supp.pdf
10. MaceHead\_Winter\_supp.pdf
11. Weybourne\_supp.pdf
