# Supplementary figures and images for: A meta-analysis of particle water uptake reconciliation studies
Source: Copernicus journal article supplement (doi:10.5194/acp-14-11833-2014), 2014-11-11

# Mace Head (MaCloud) Winter

No  
Polydisperse  
Data

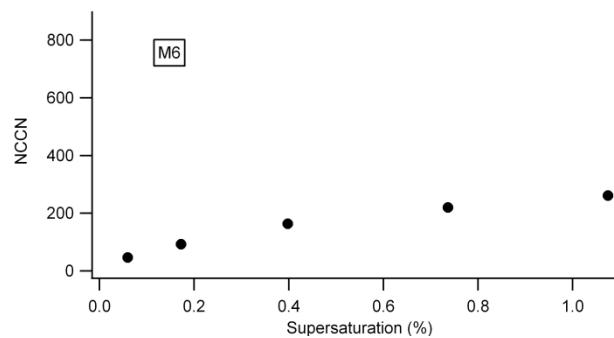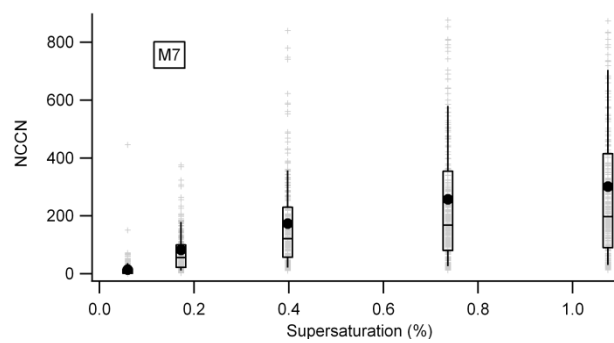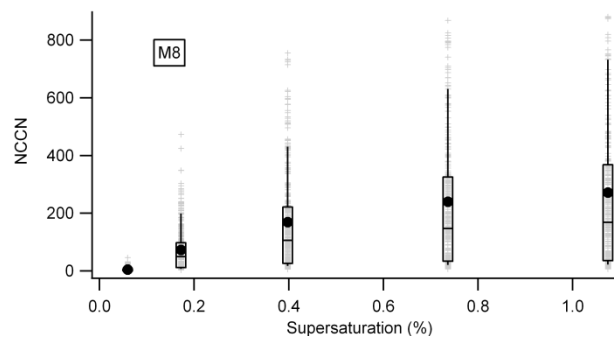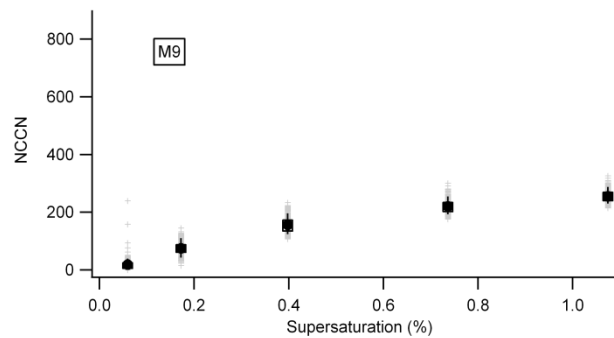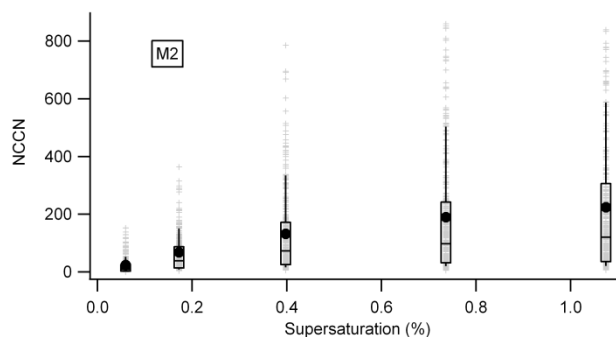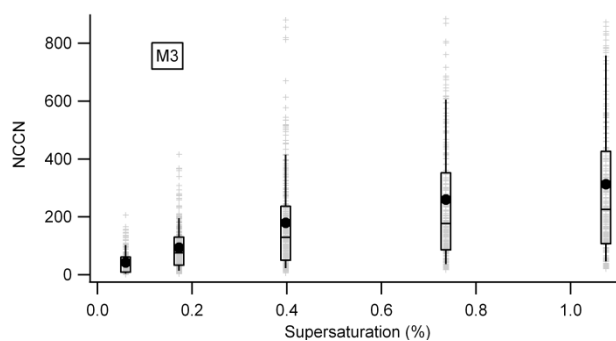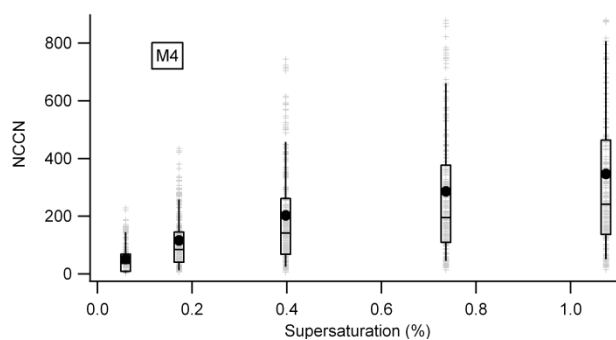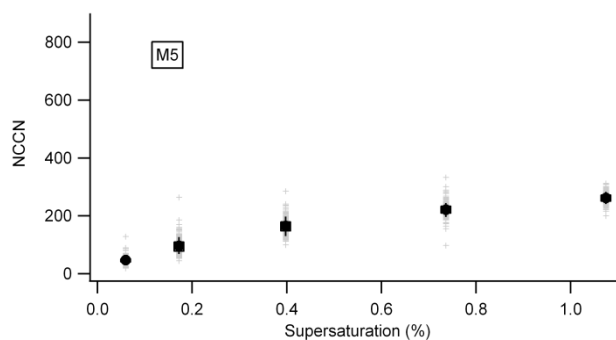

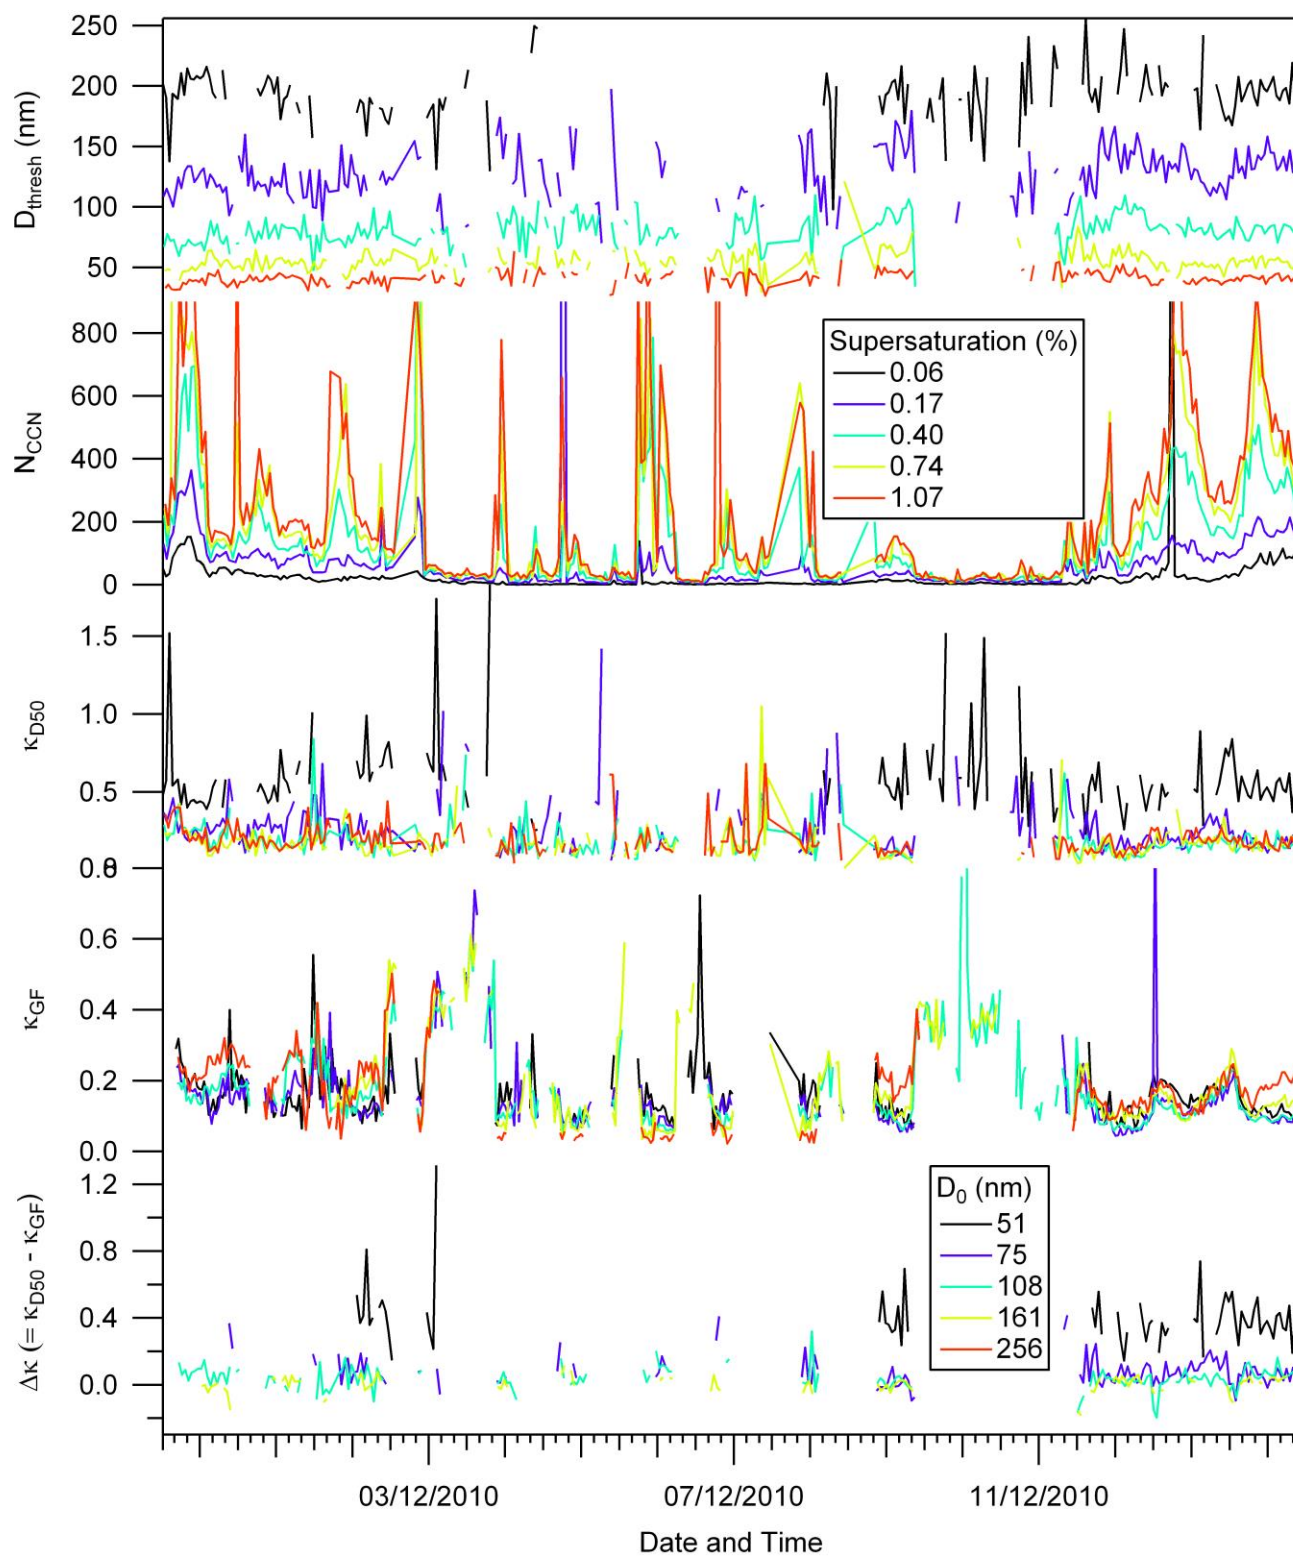

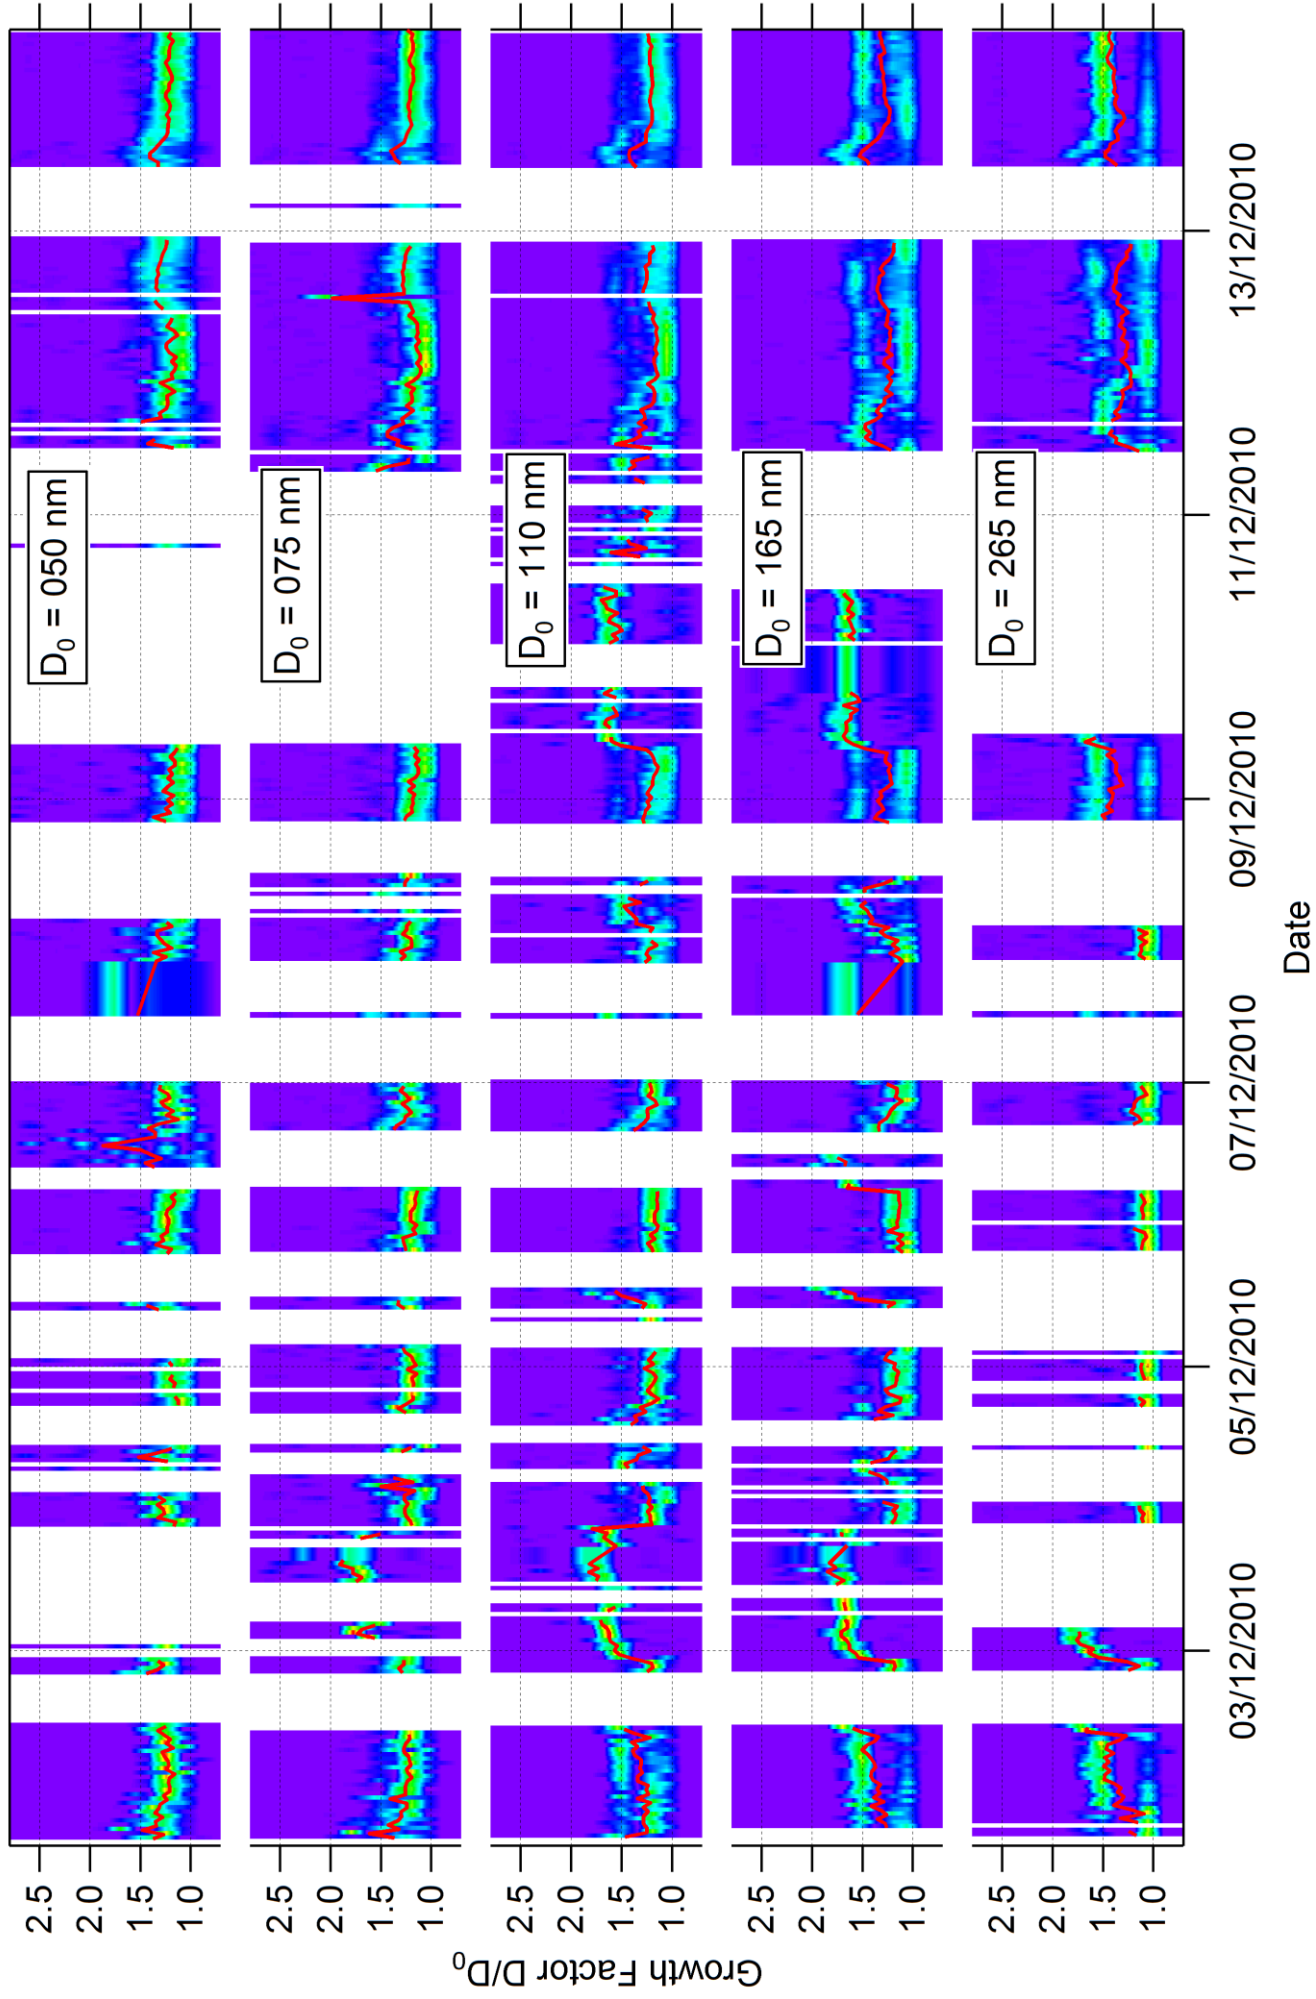

Supplement: Supplementary file 1 [file acp-14-11833-2014-supplement.zip]

# Hornisgrinde (COPS)

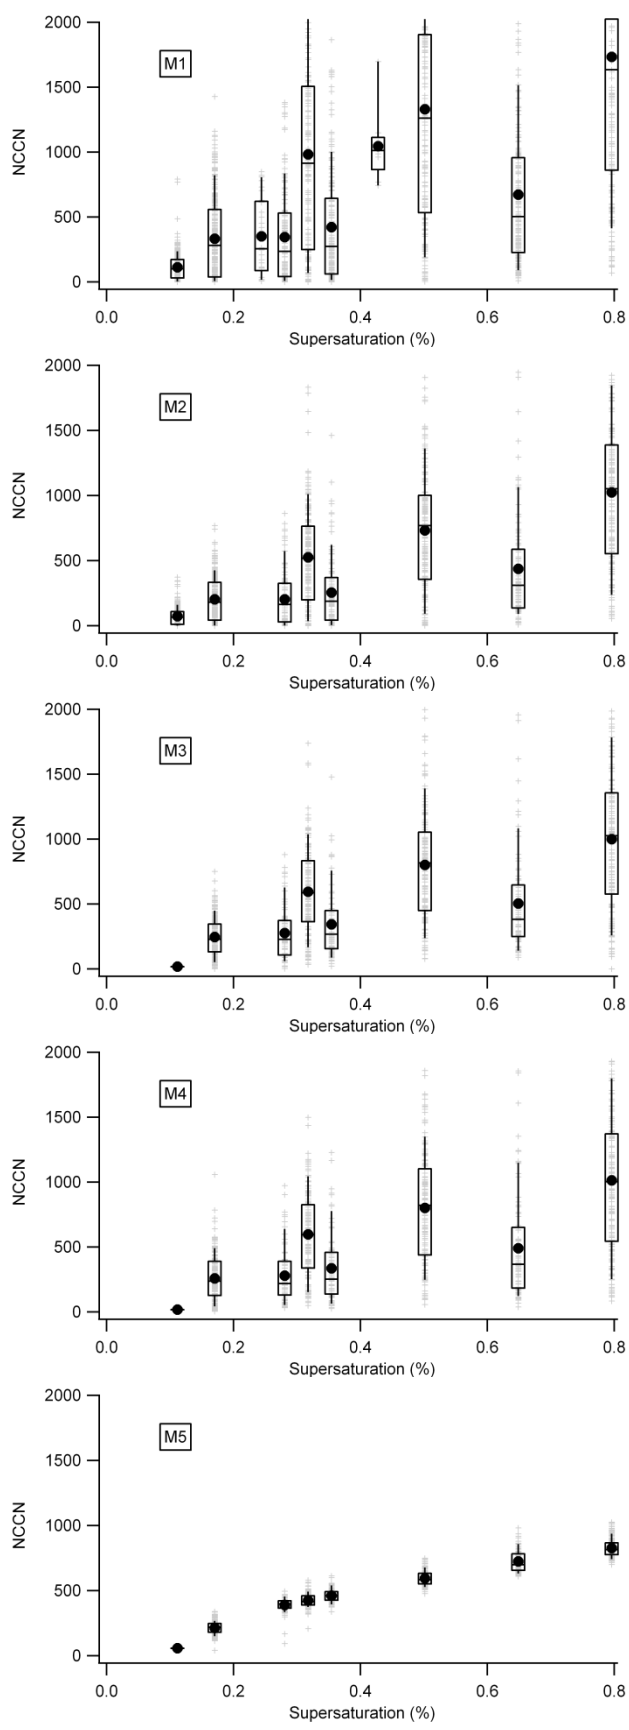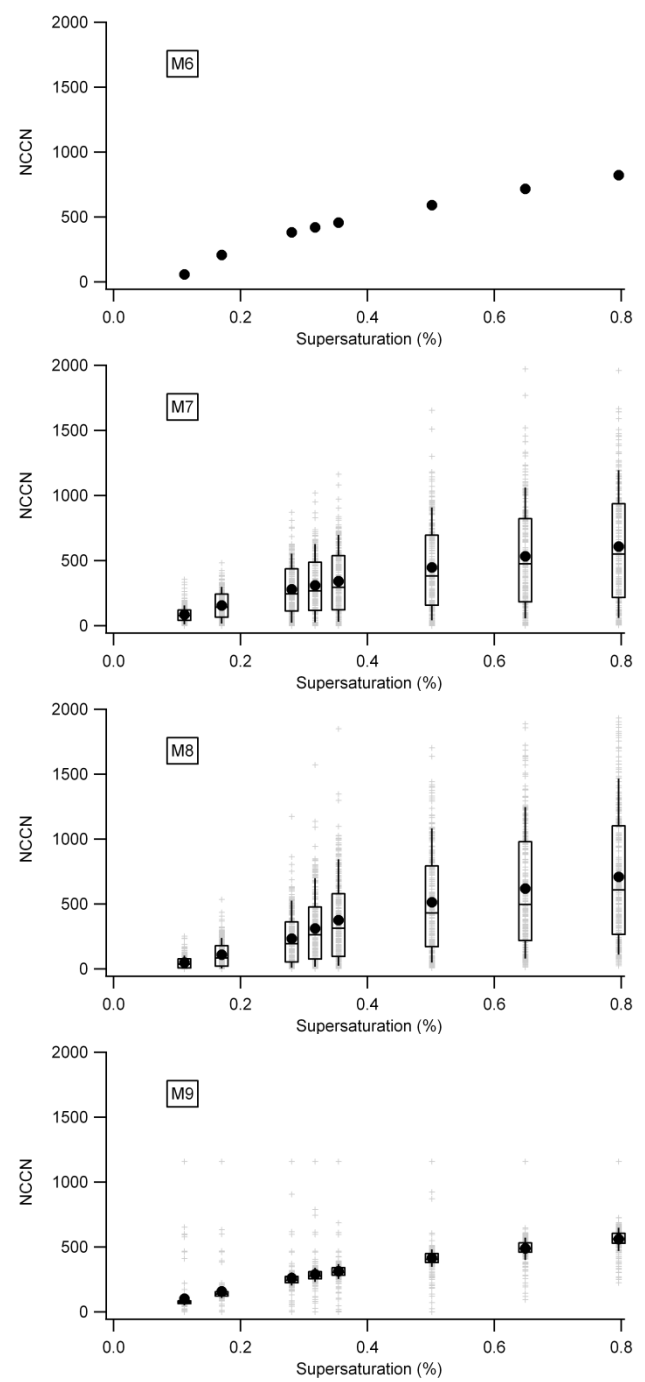

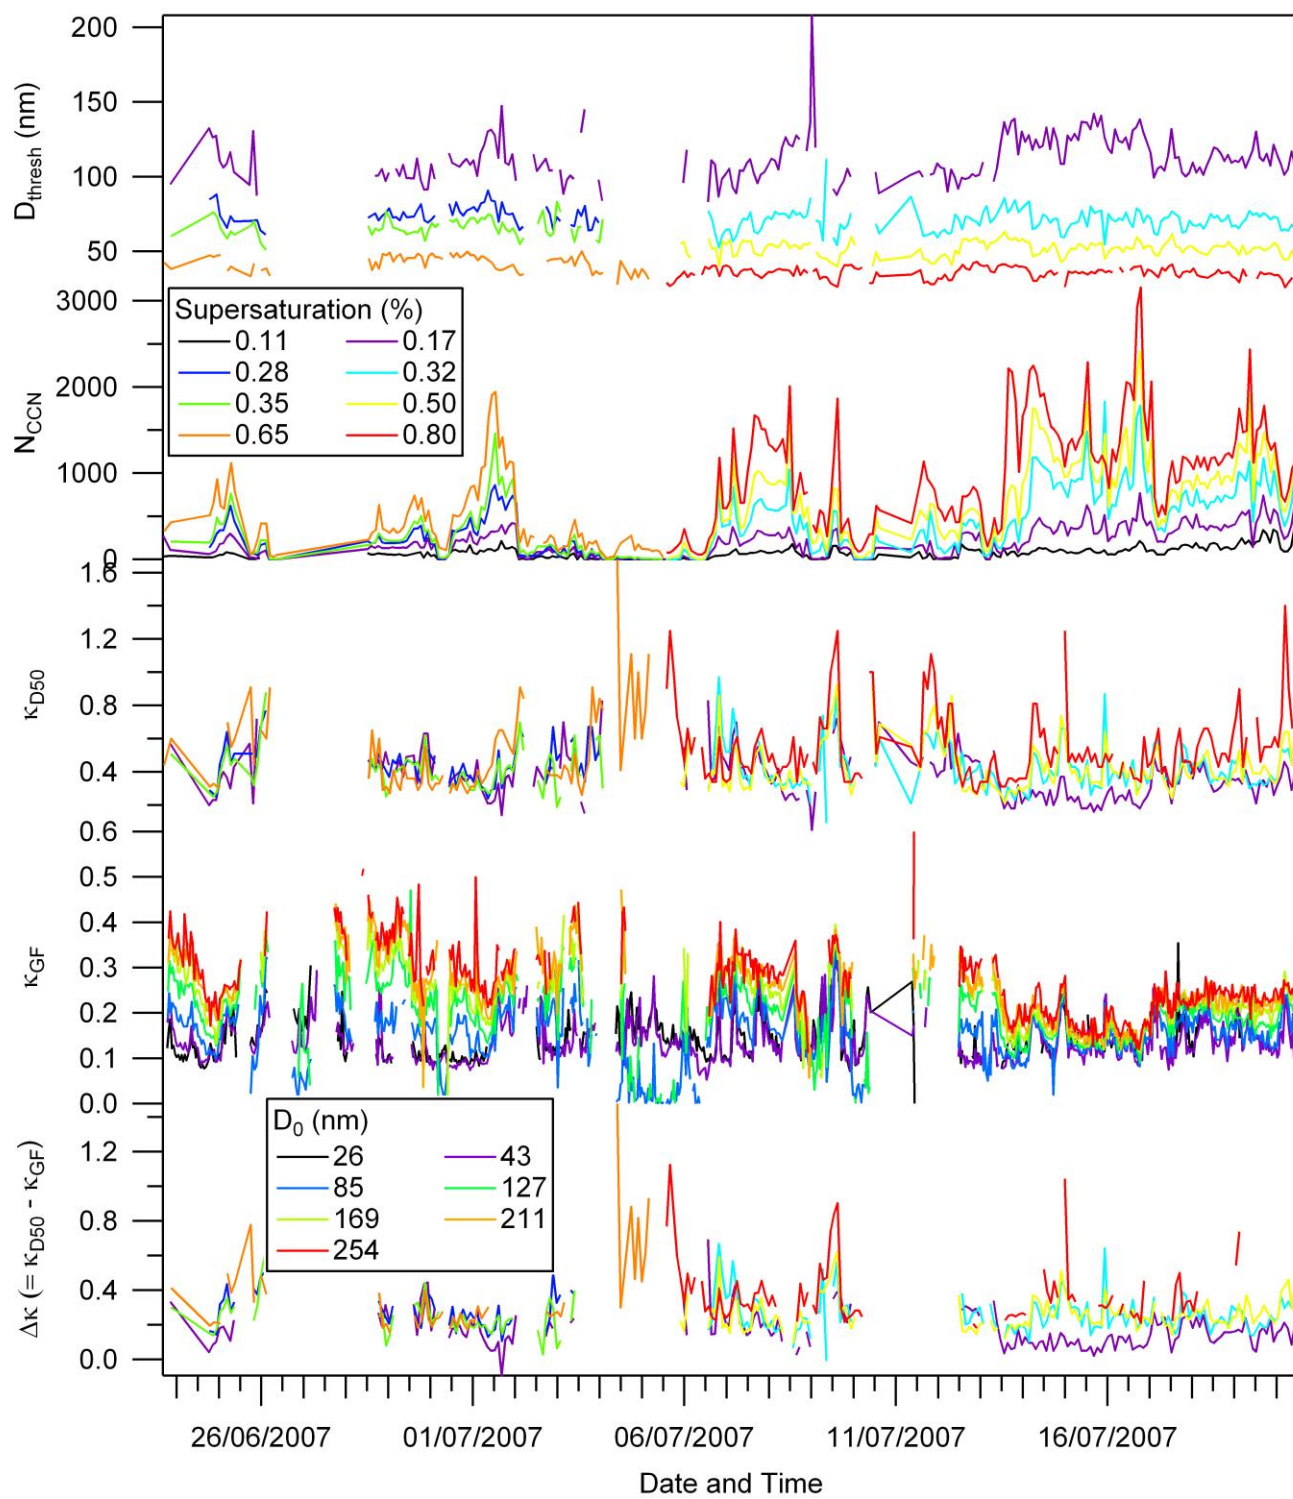



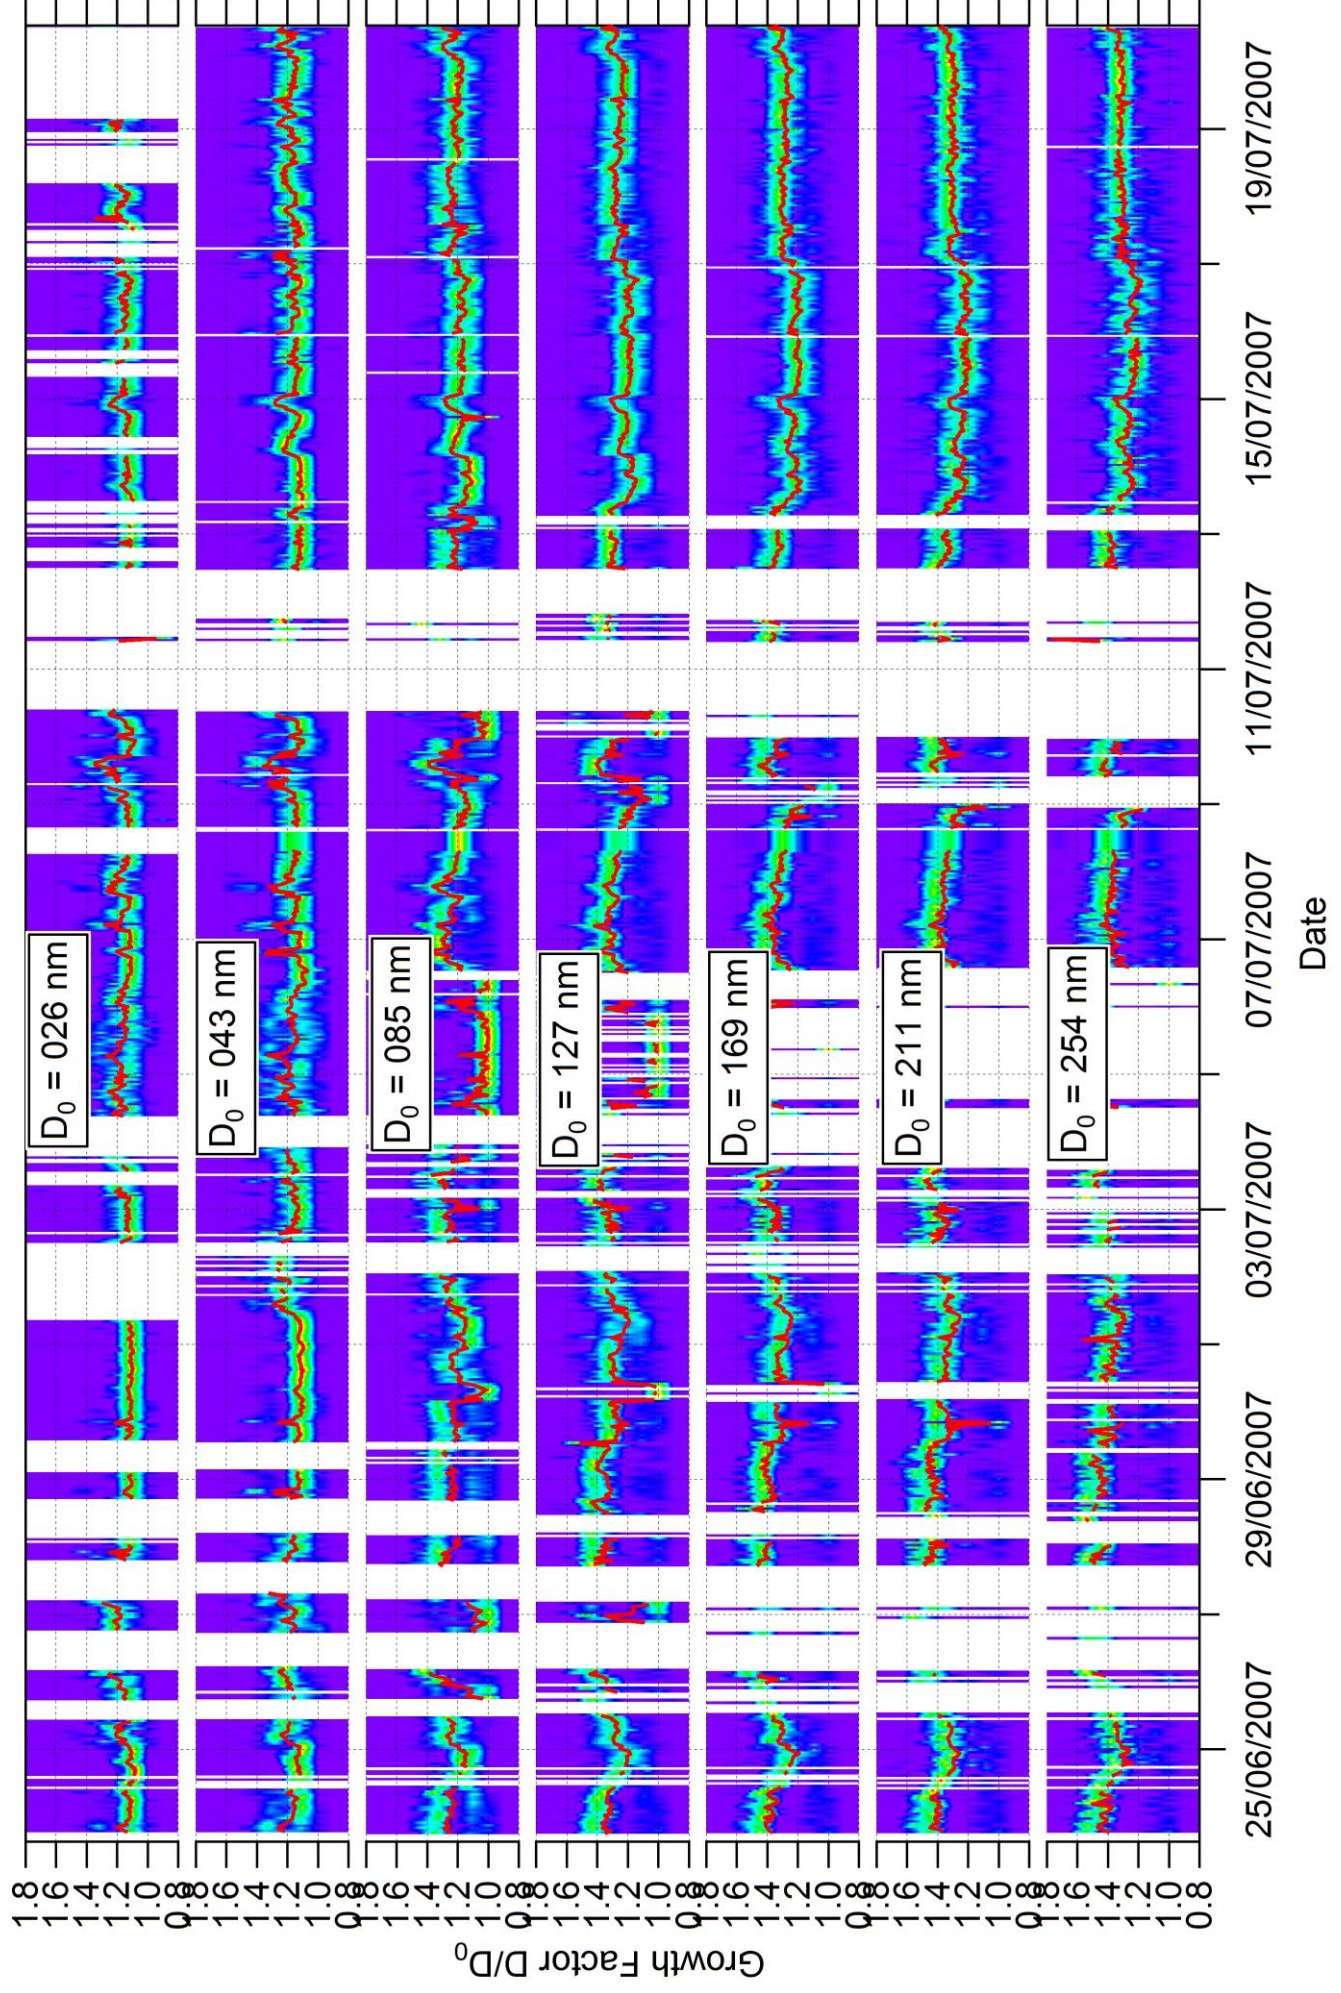

Supplement: Supplementary file 3 [file acp-14-11833-2014-supplement.zip]

# Weybourne (MC4)

No  
Polydisperse  
Data

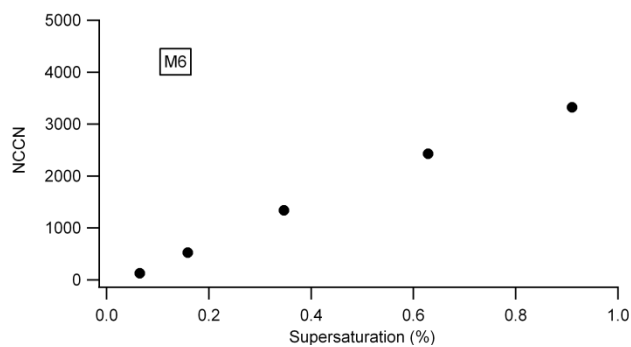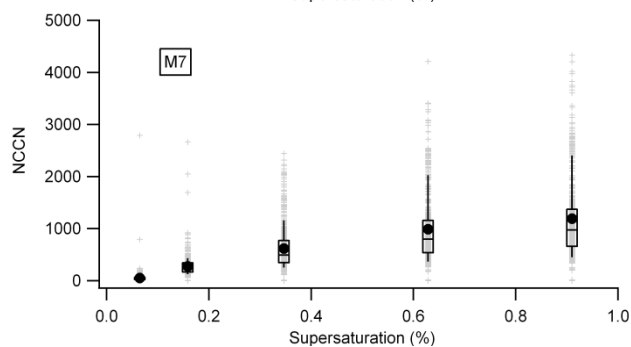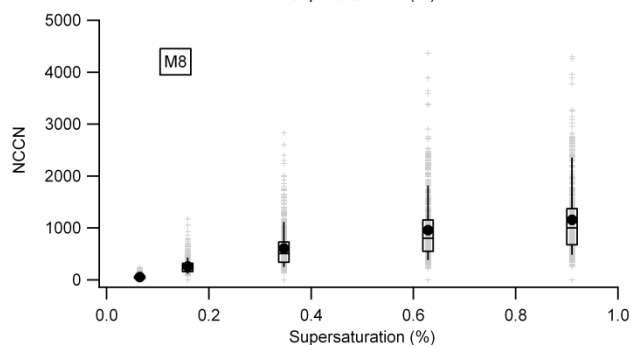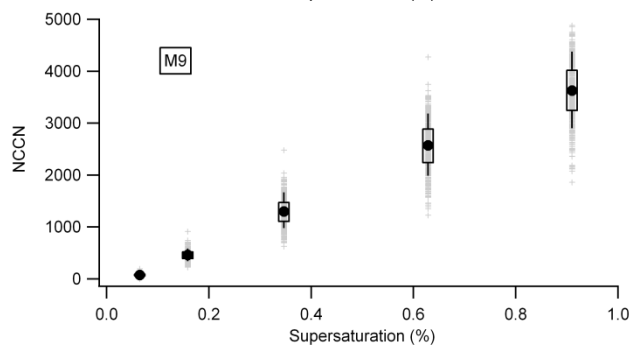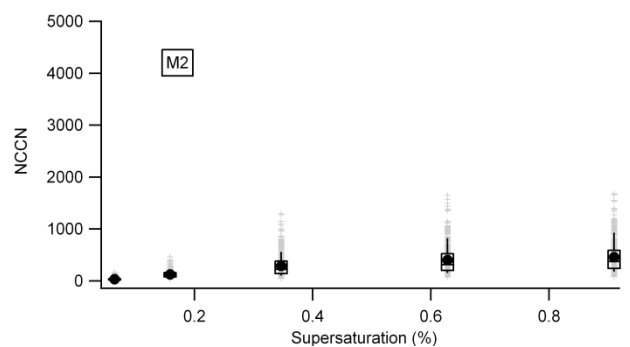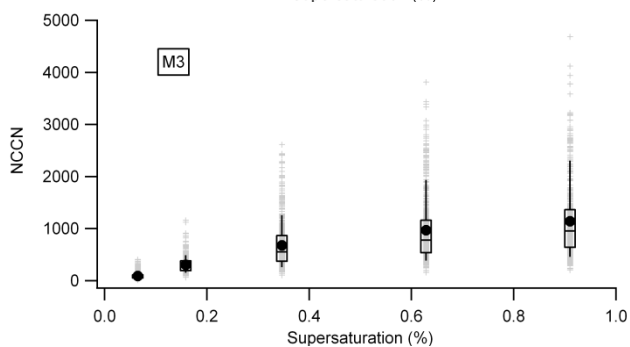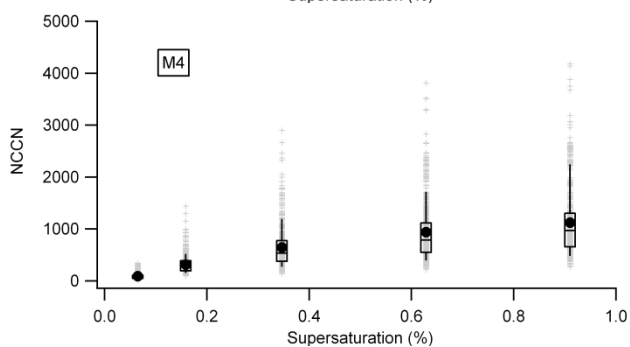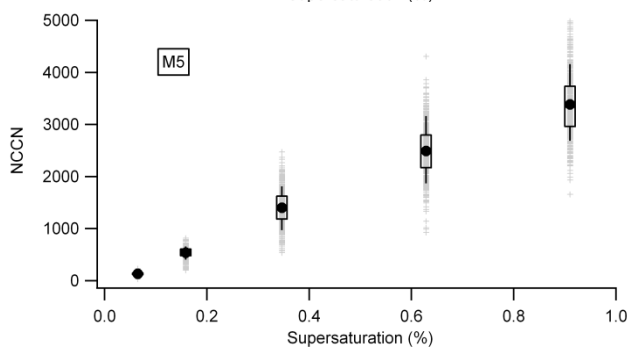

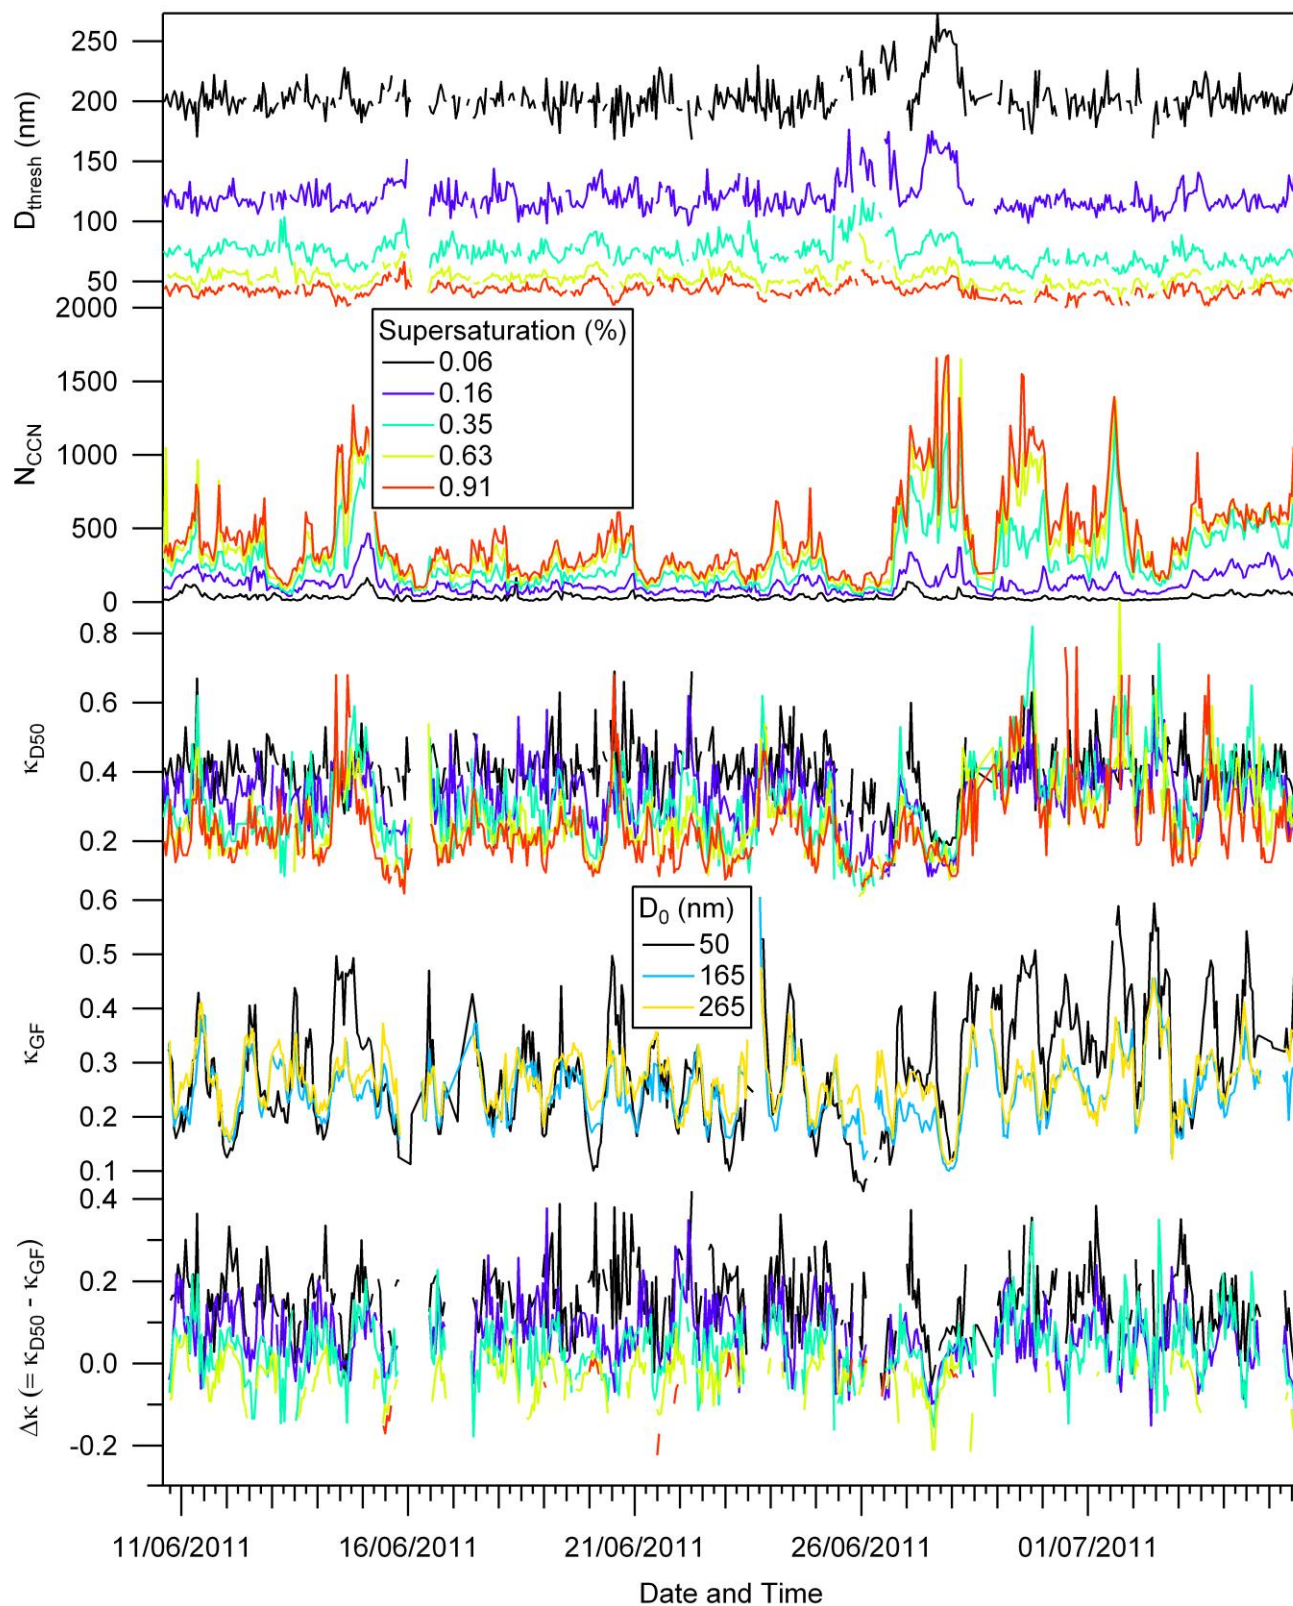

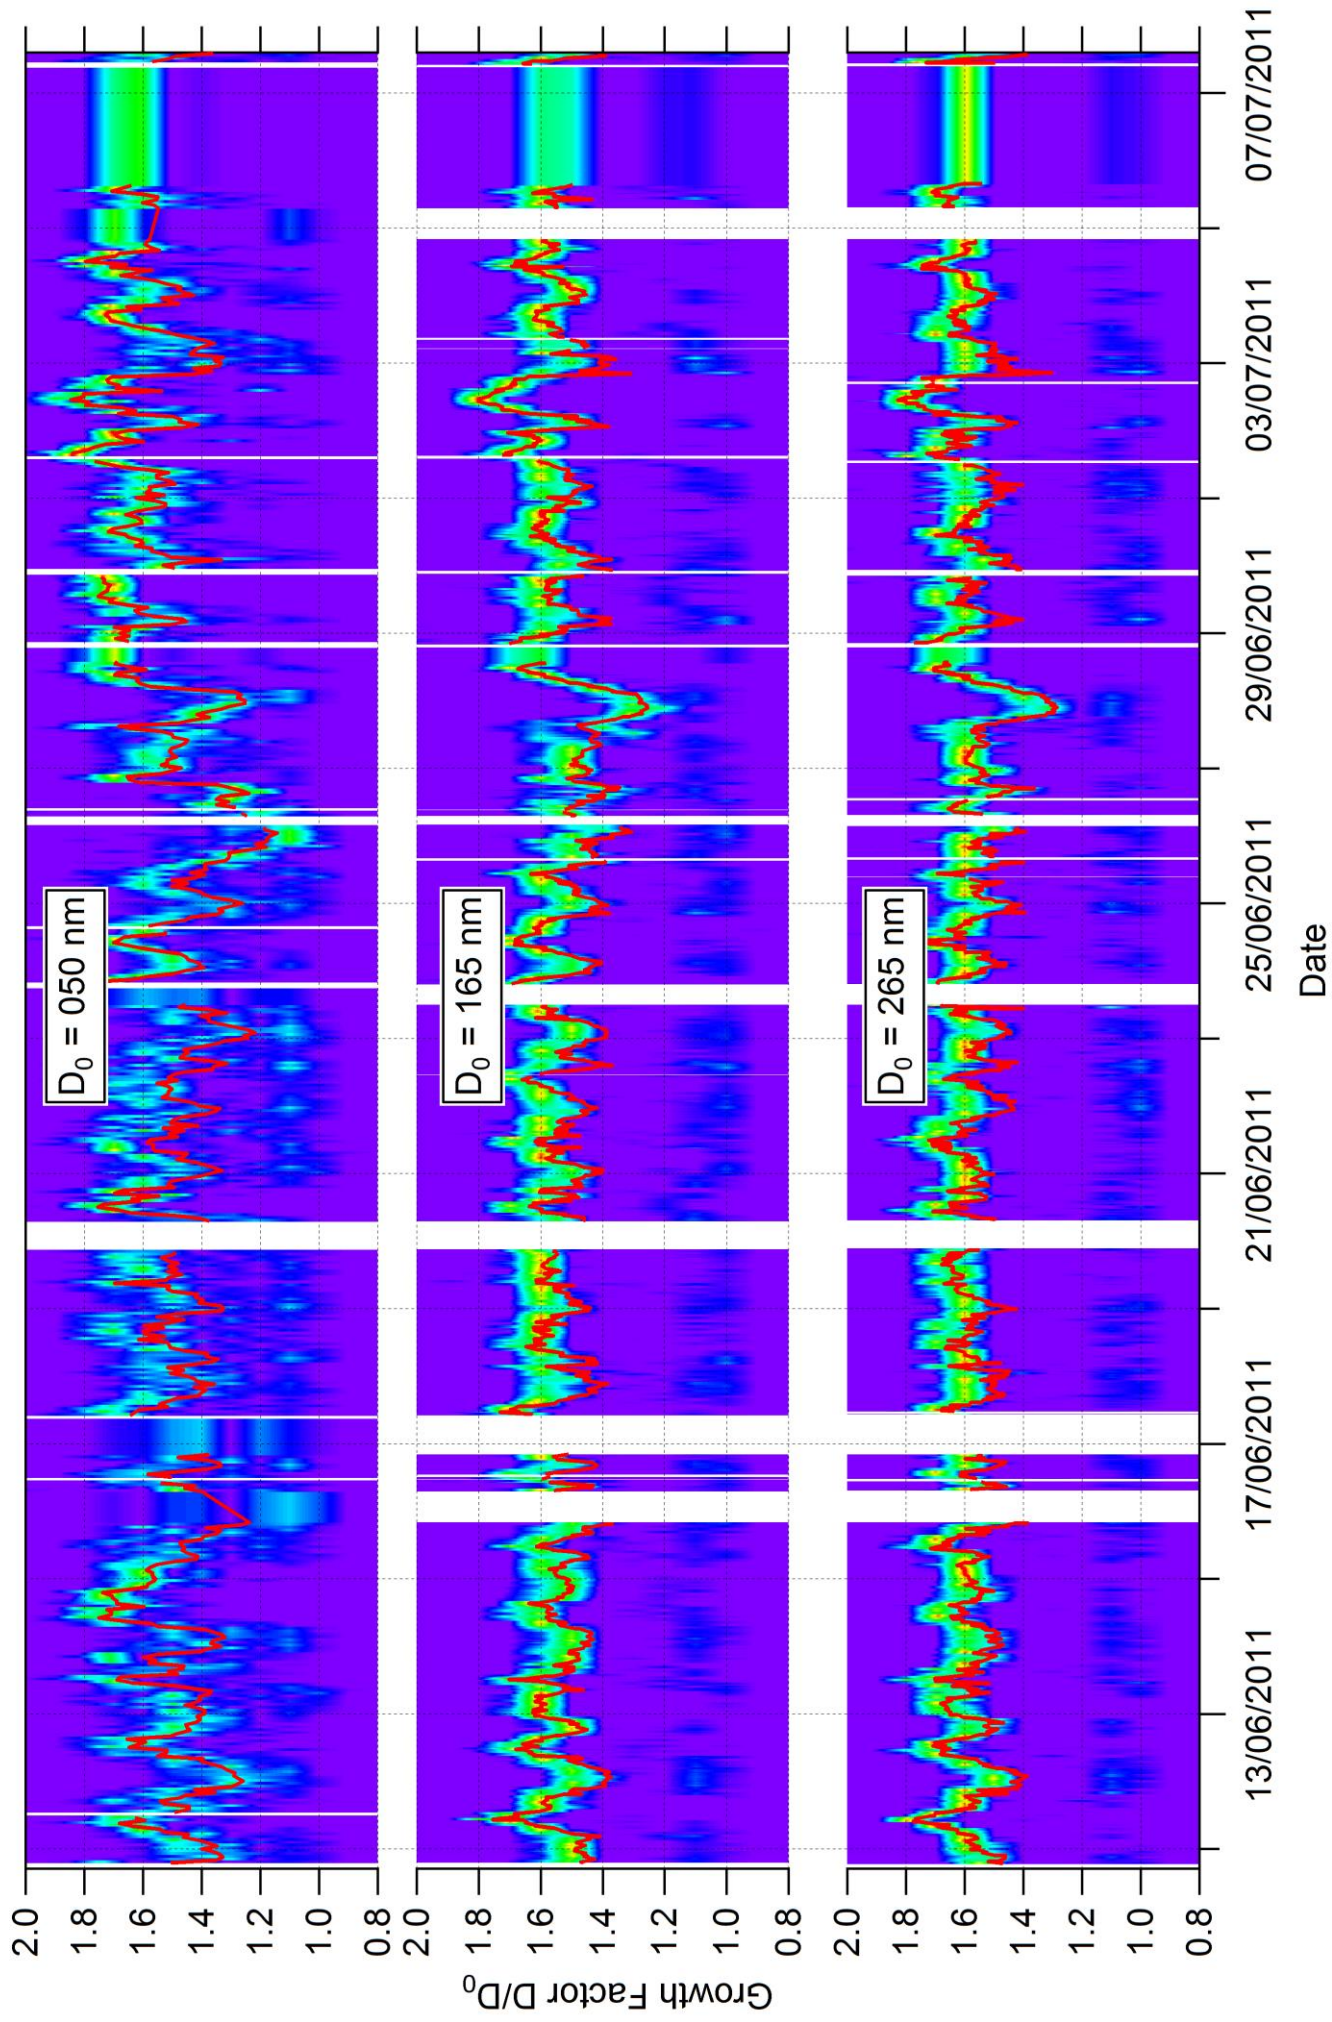

Supplement: Supplementary file 4 [file acp-14-11833-2014-supplement.zip]

# Mace Head (MaCloud) Summer

No  
Polydisperse  
Data

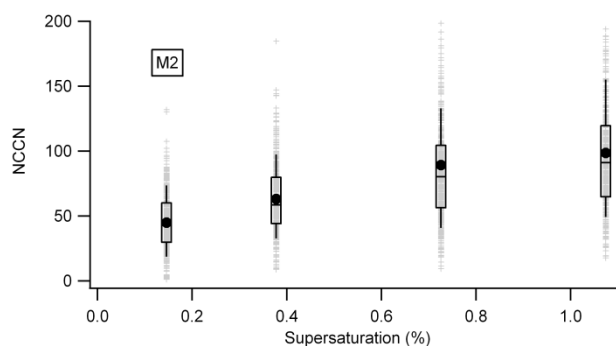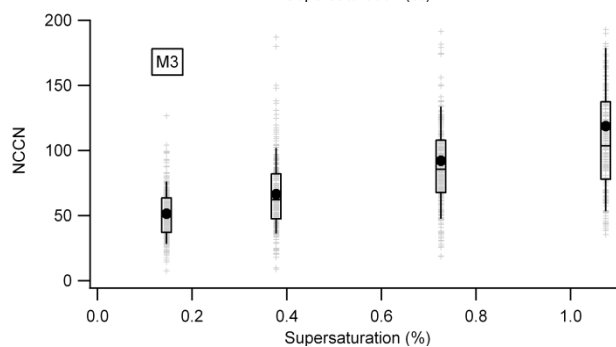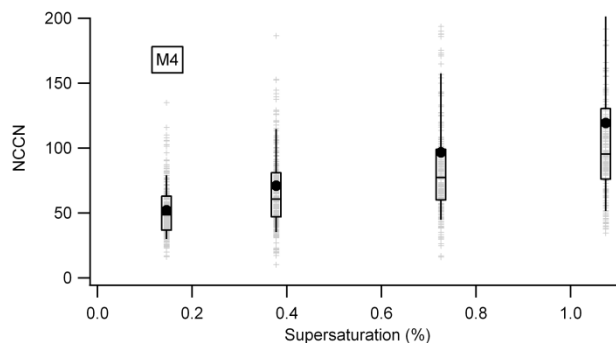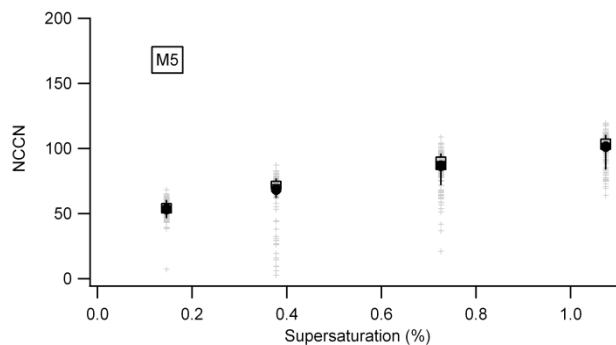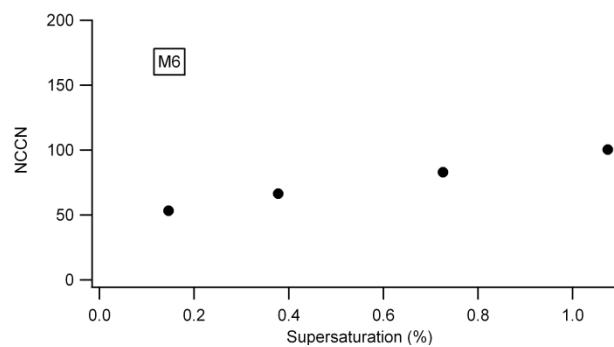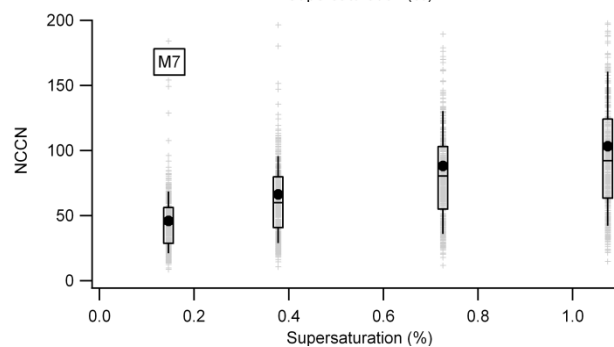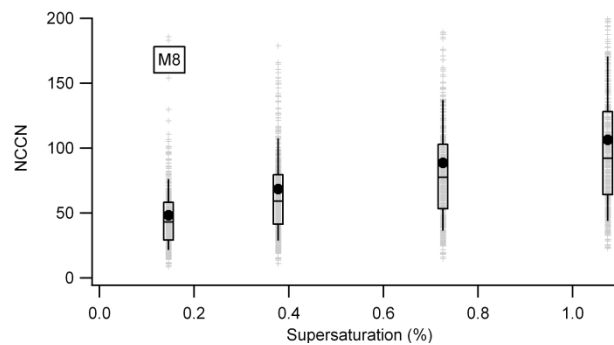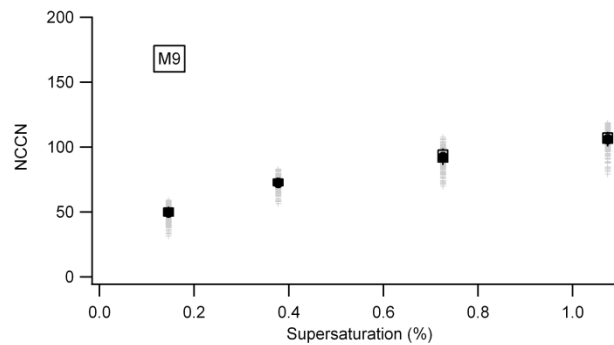

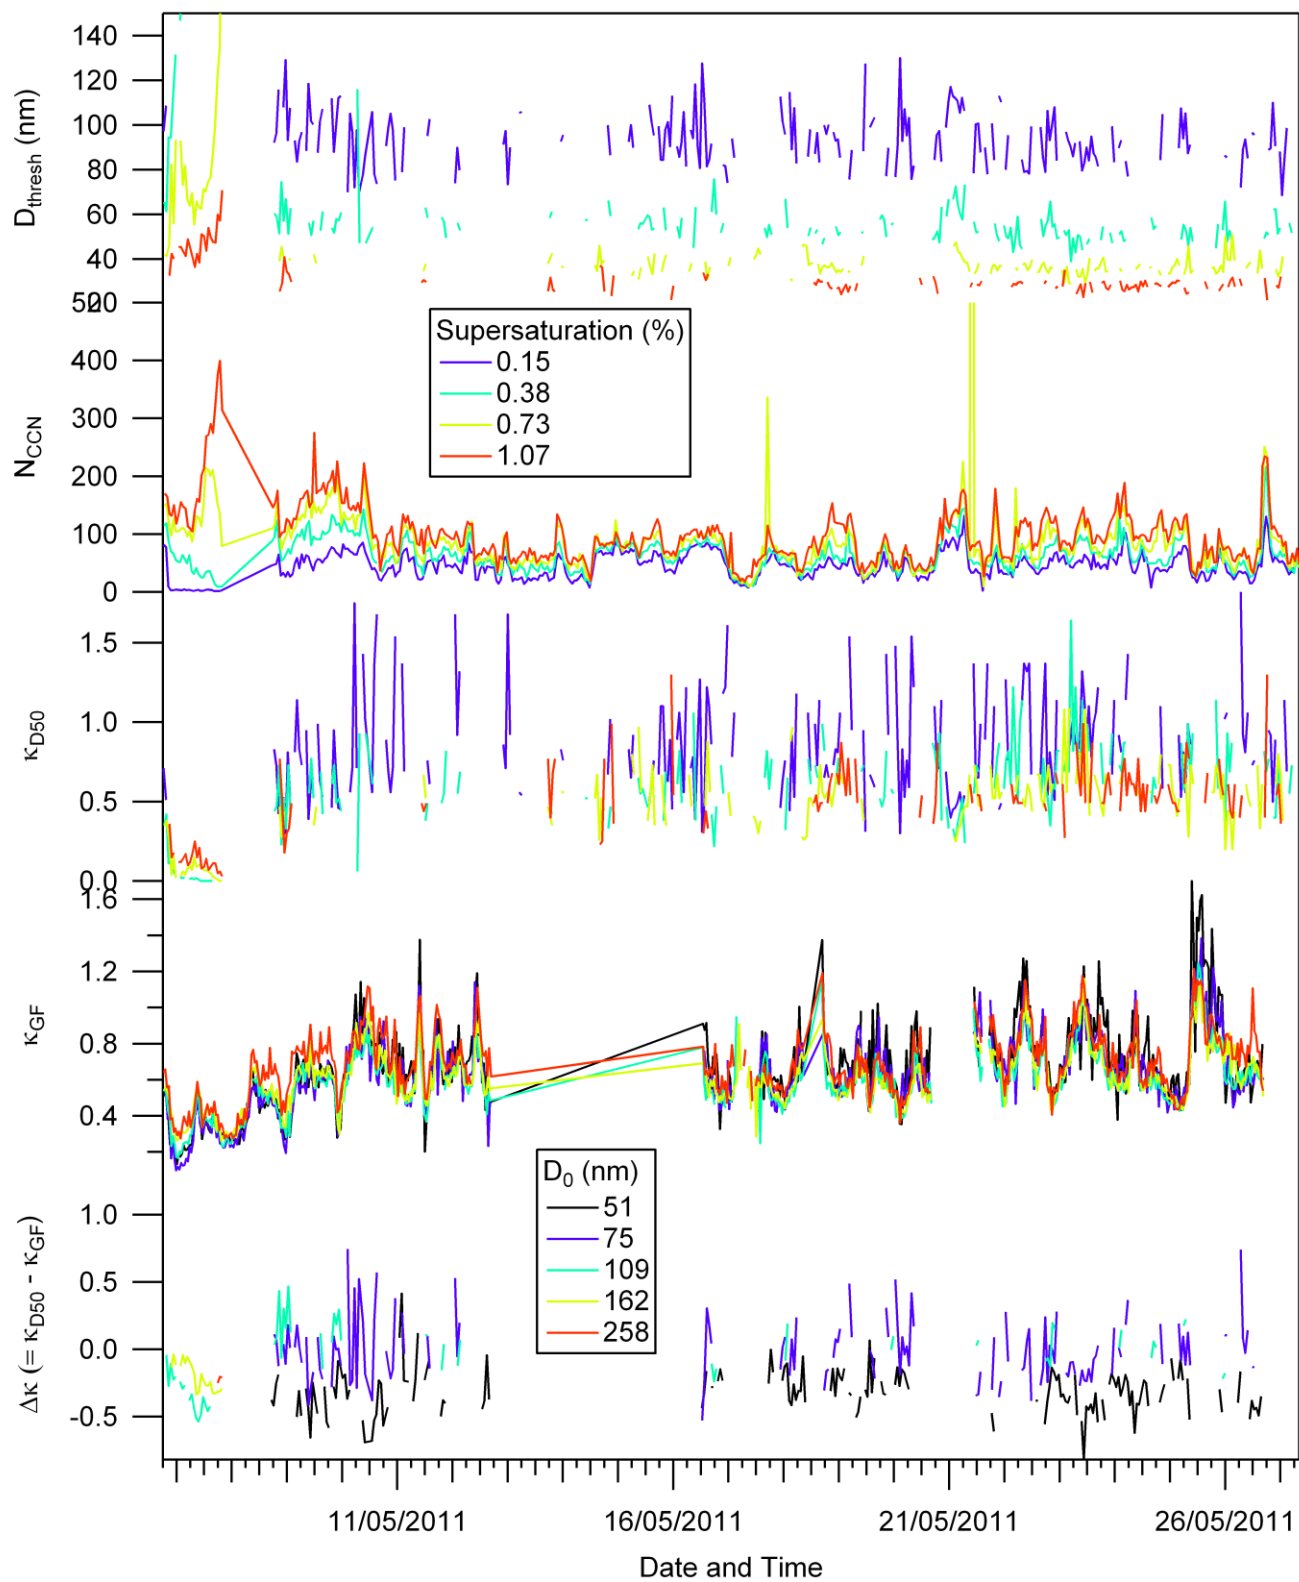

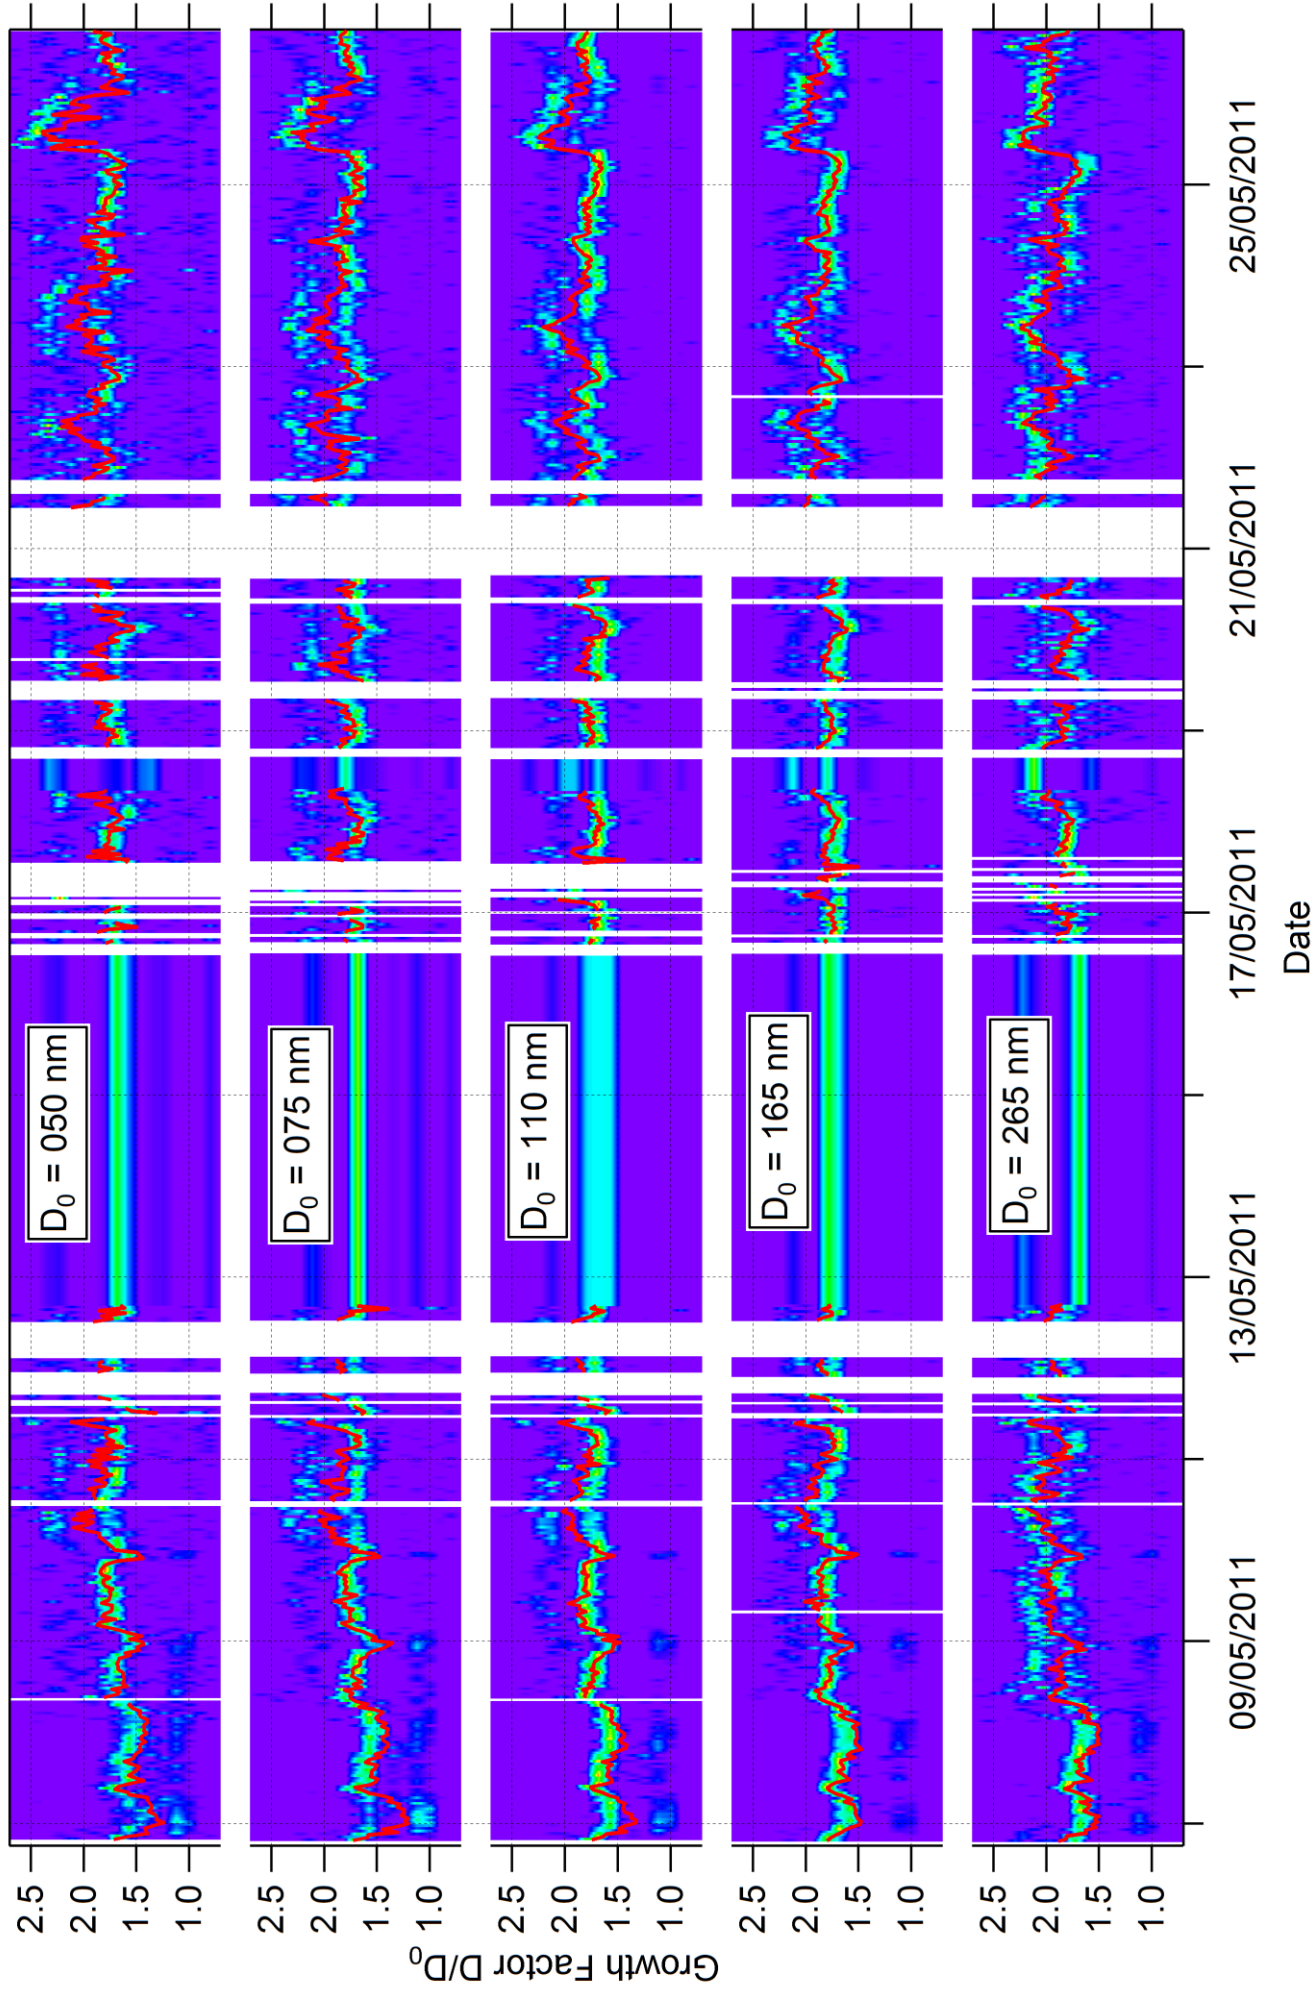

Supplement: Supplementary file 5 [file acp-14-11833-2014-supplement.zip]

# London (ClearfLo) Summer

No  
Polydisperse  
Data

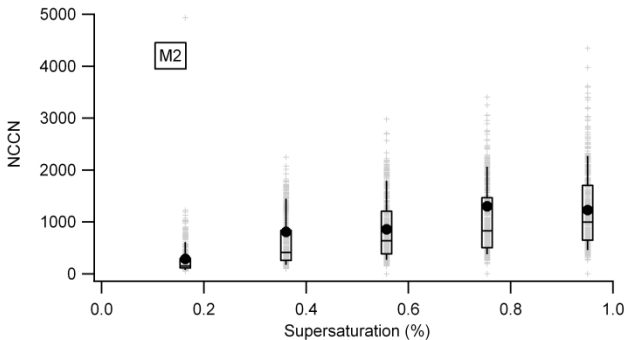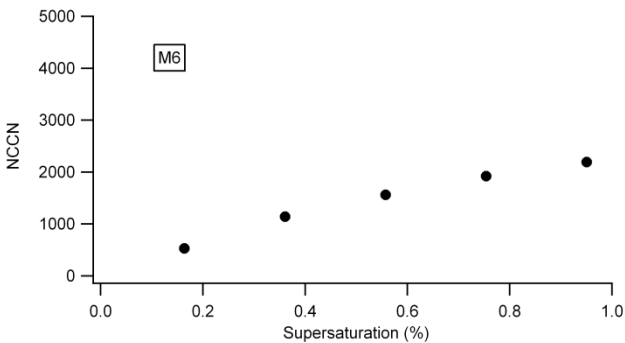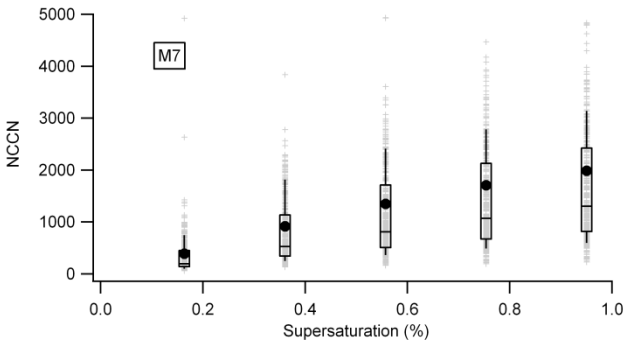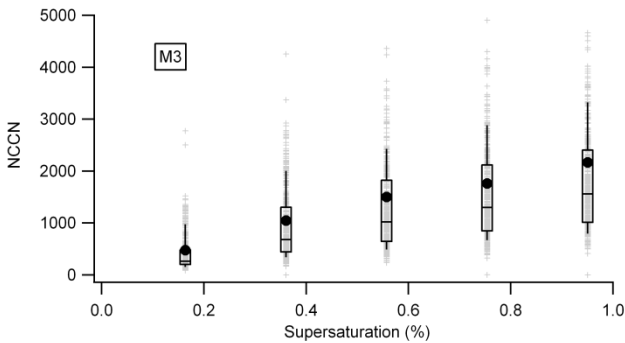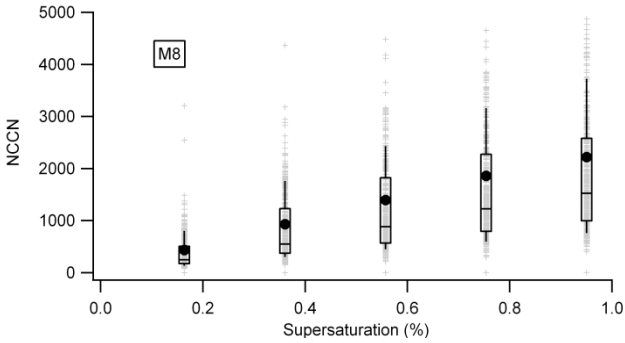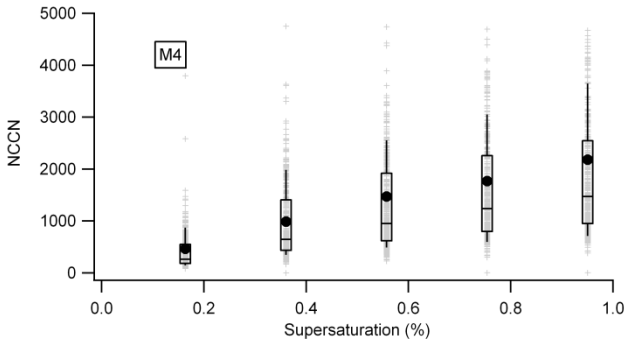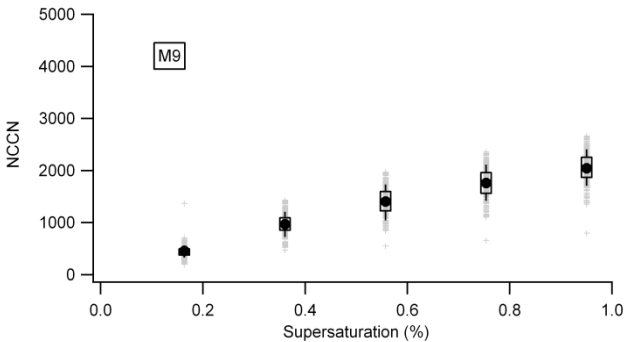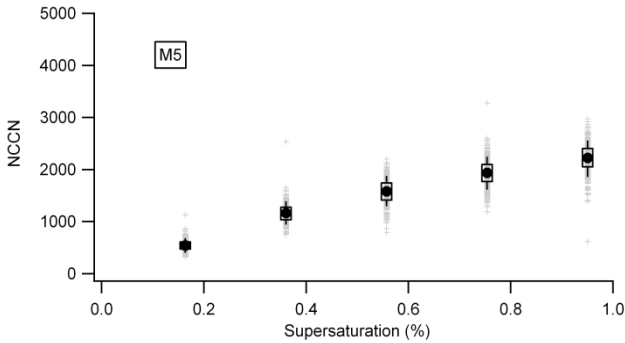

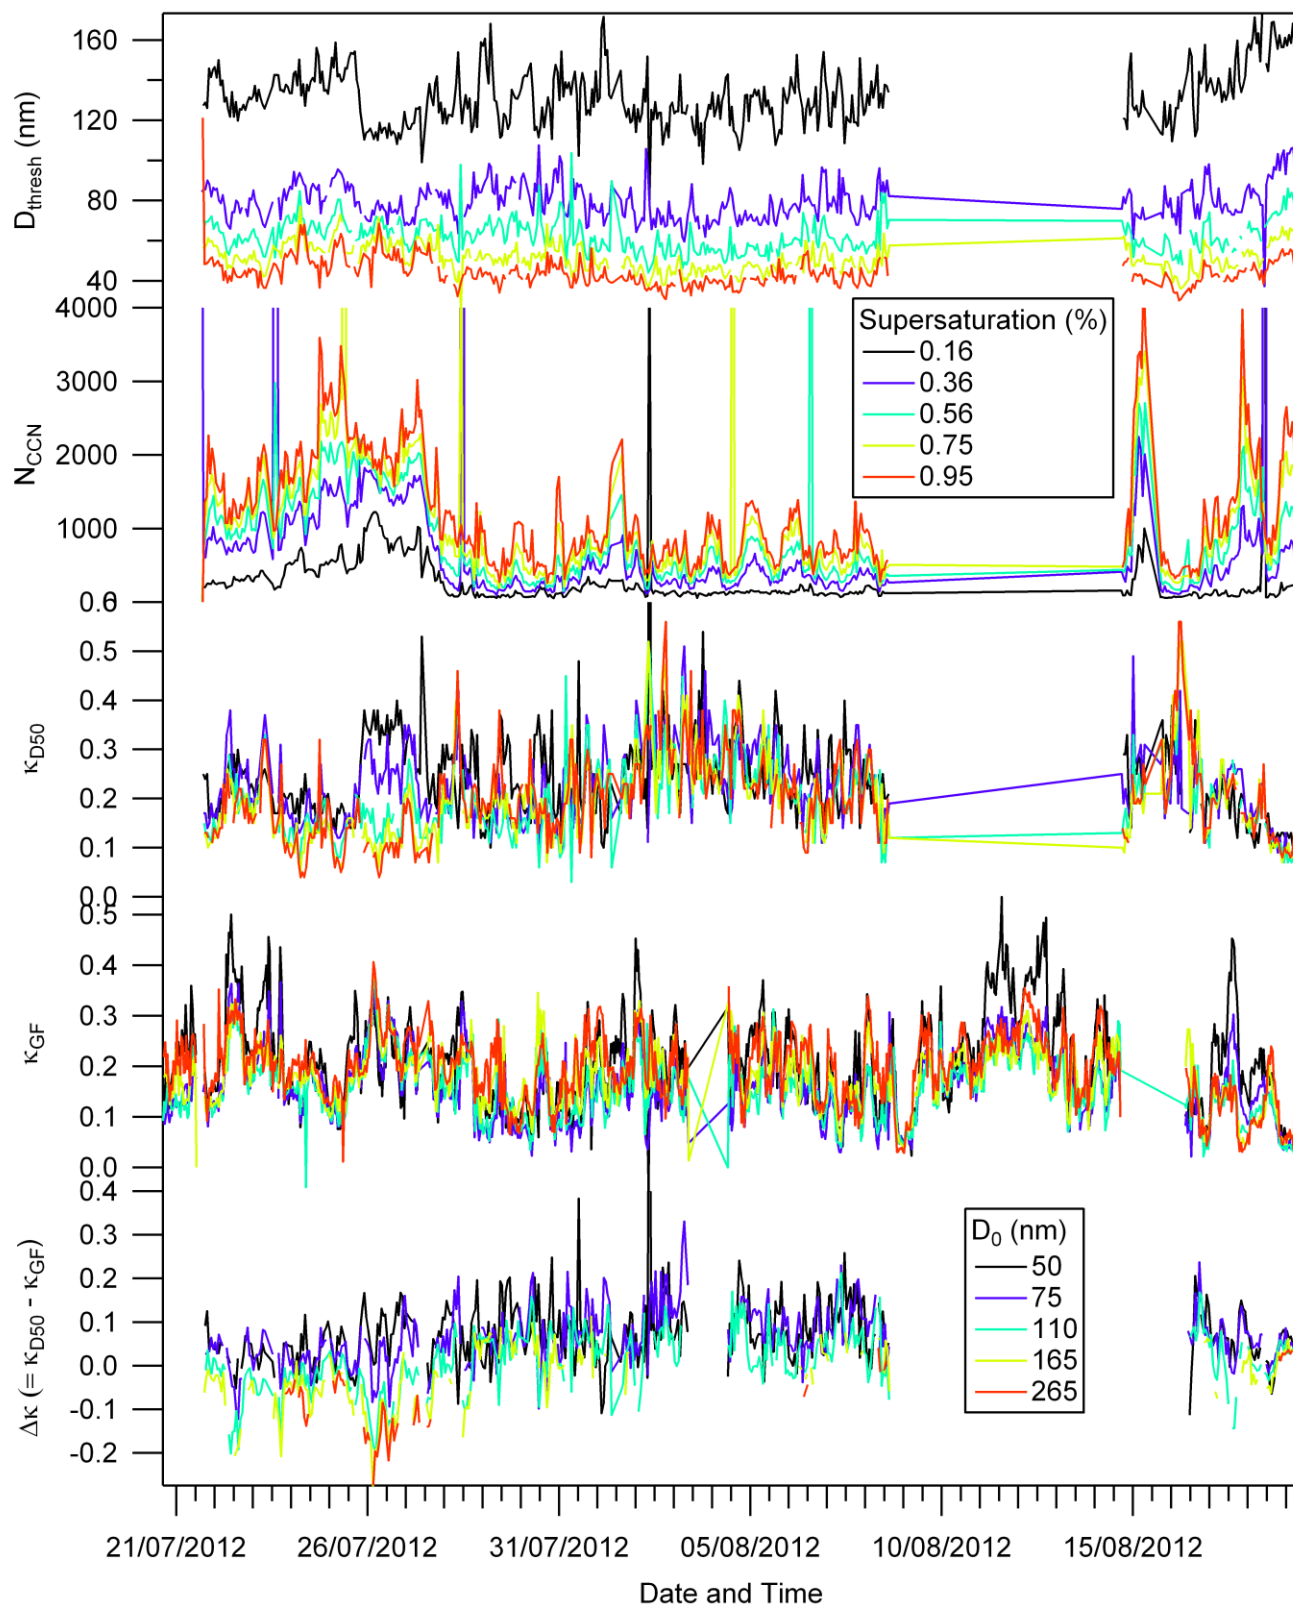

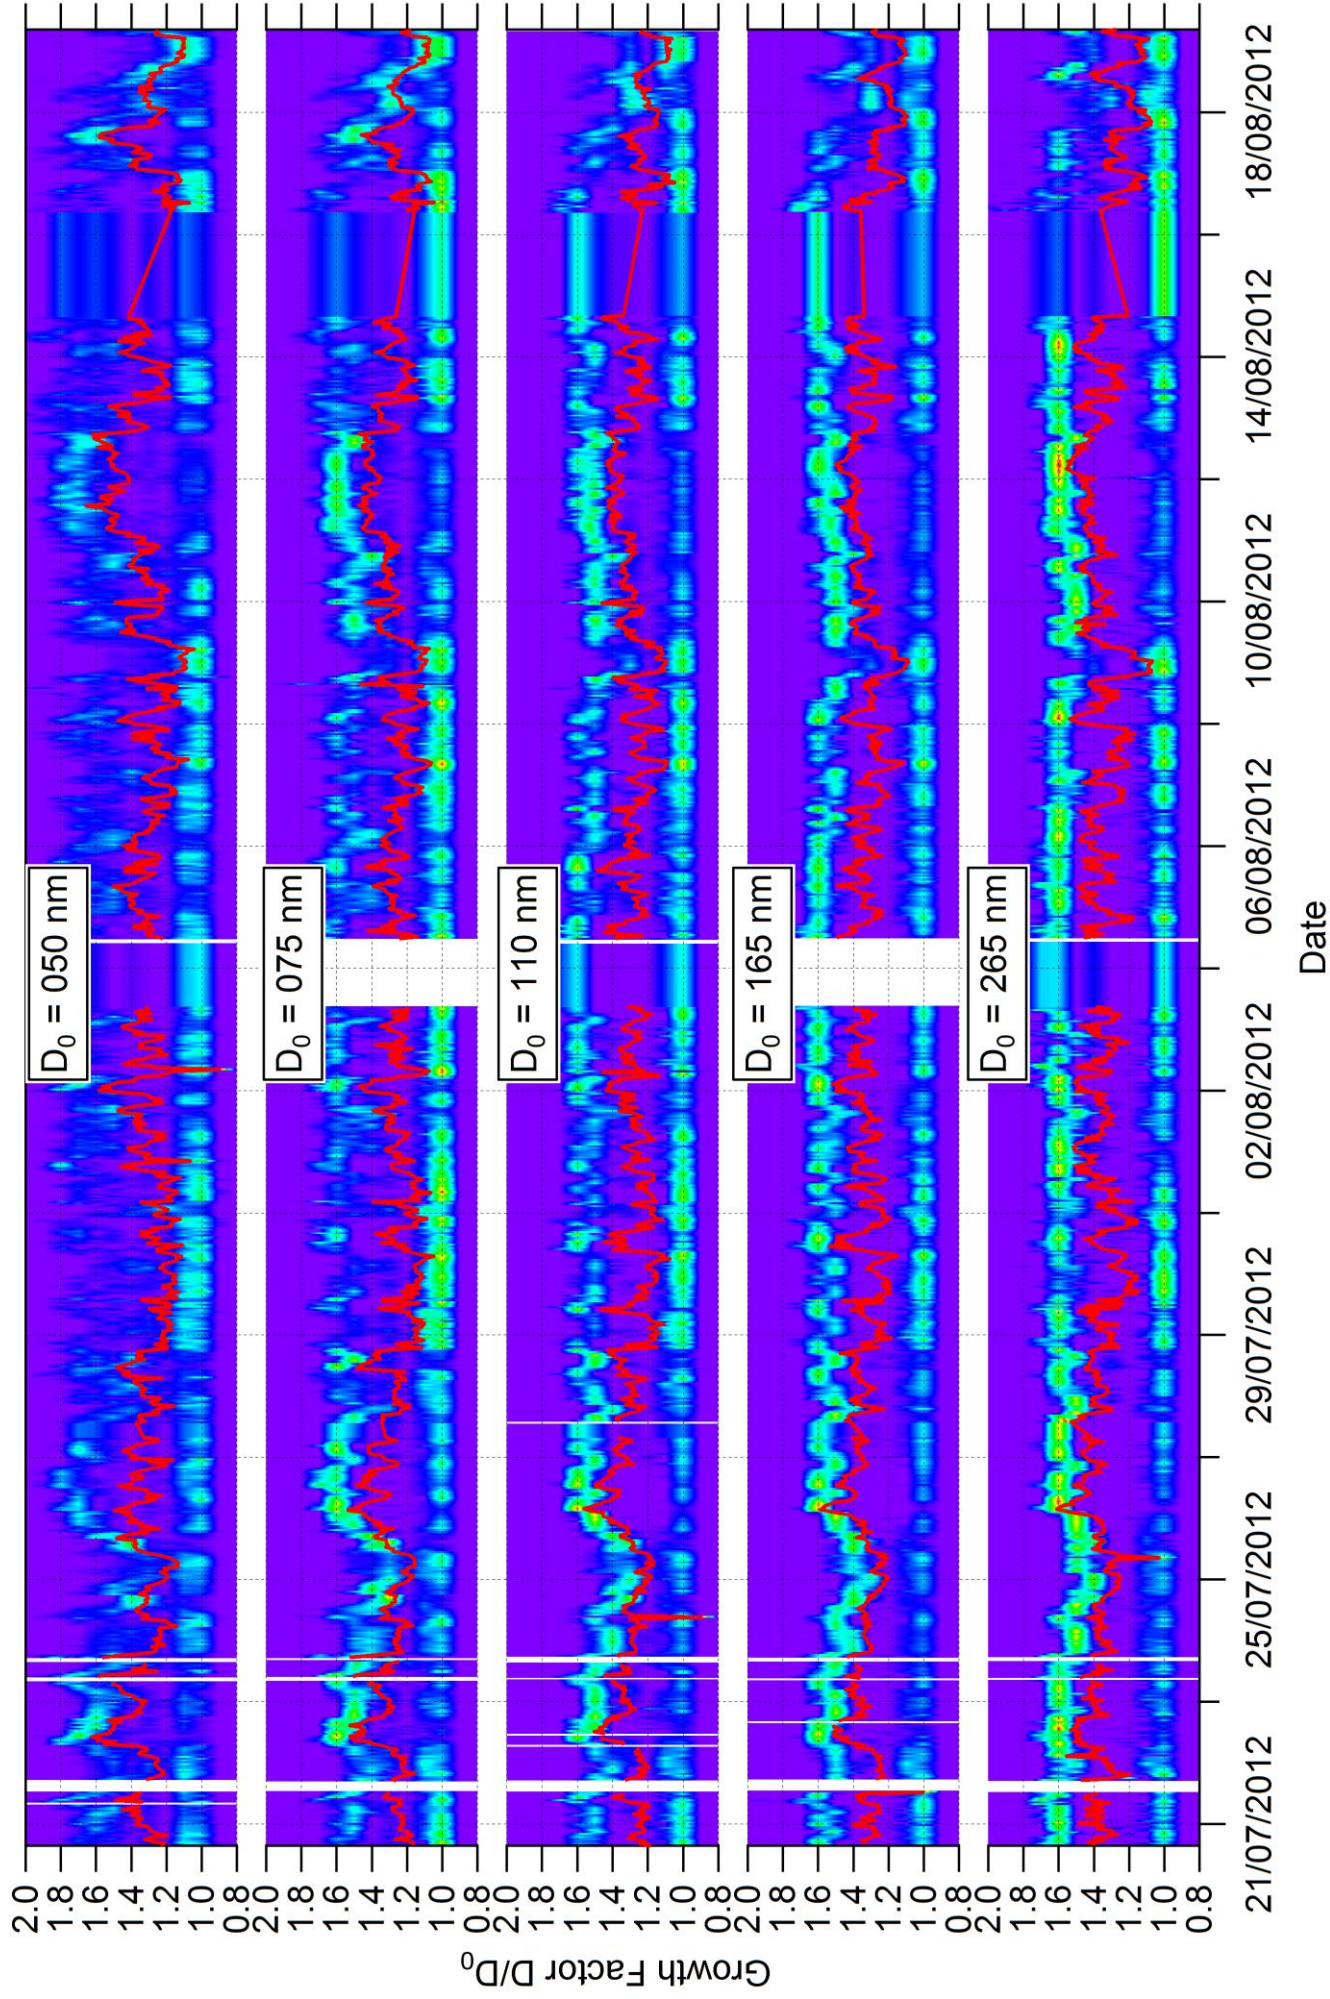

Supplement: Supplementary file 6 [file acp-14-11833-2014-supplement.zip]

# Discovery Cruise (RHaMBLe)

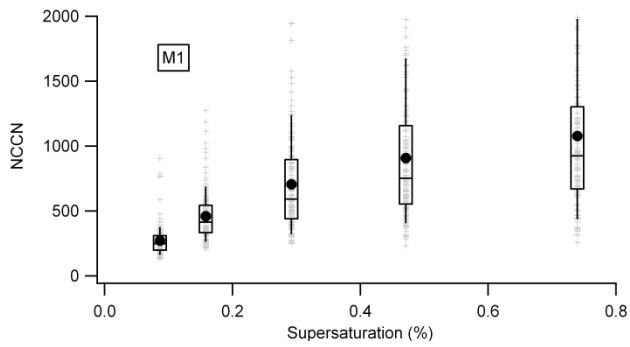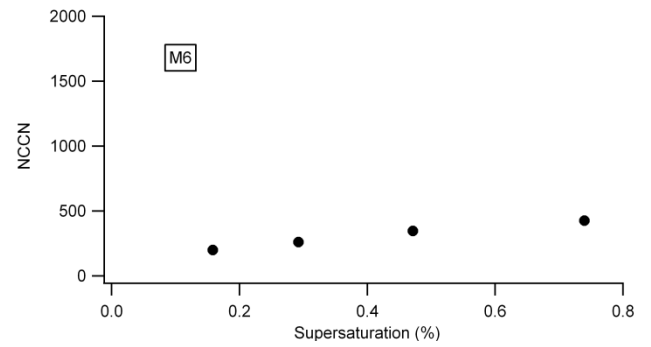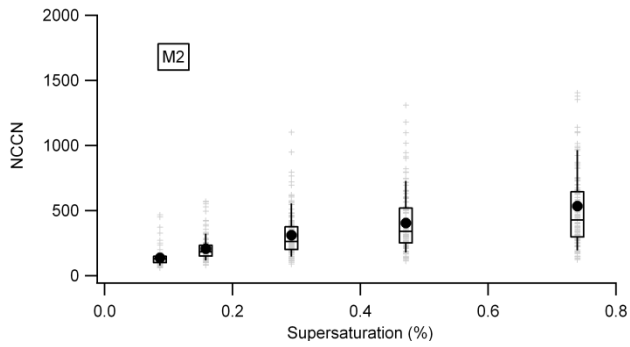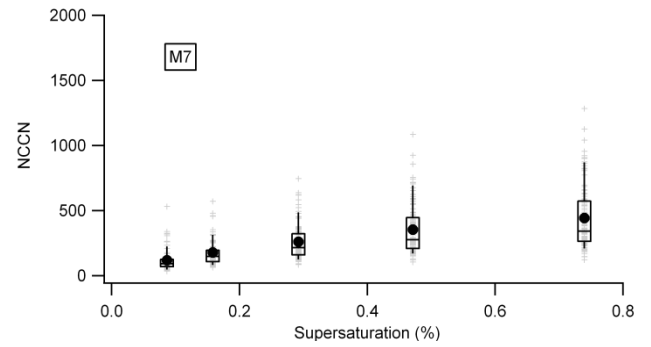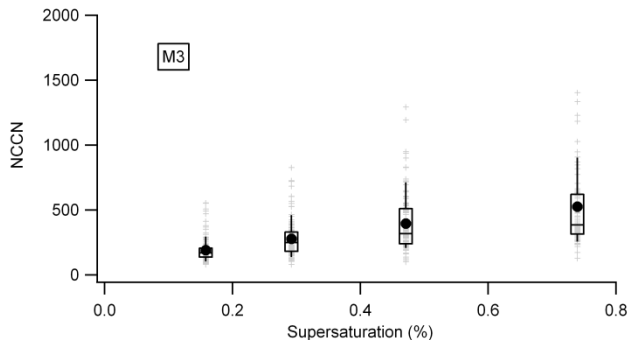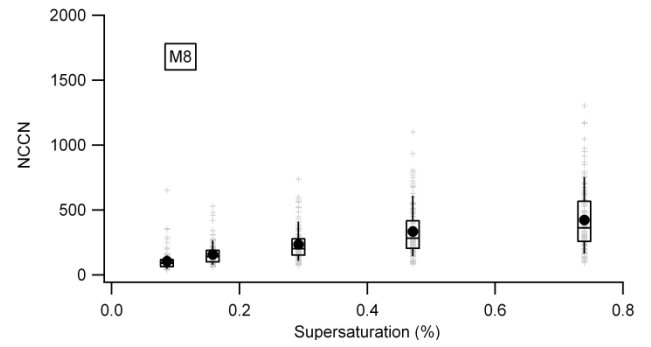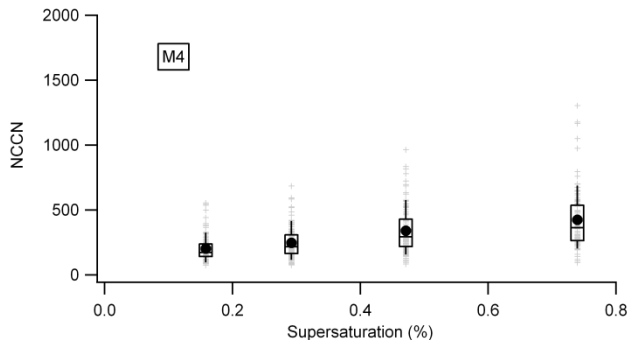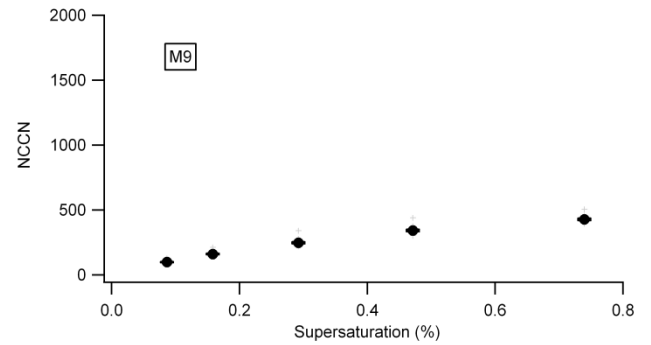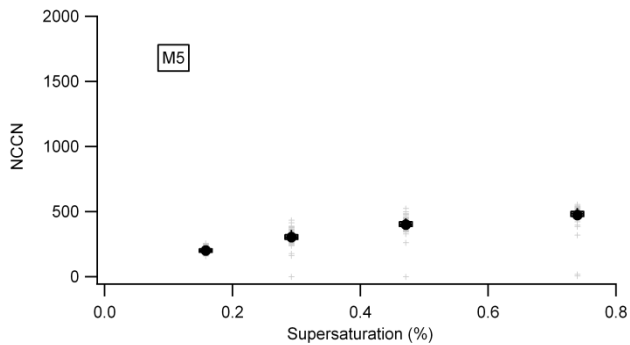

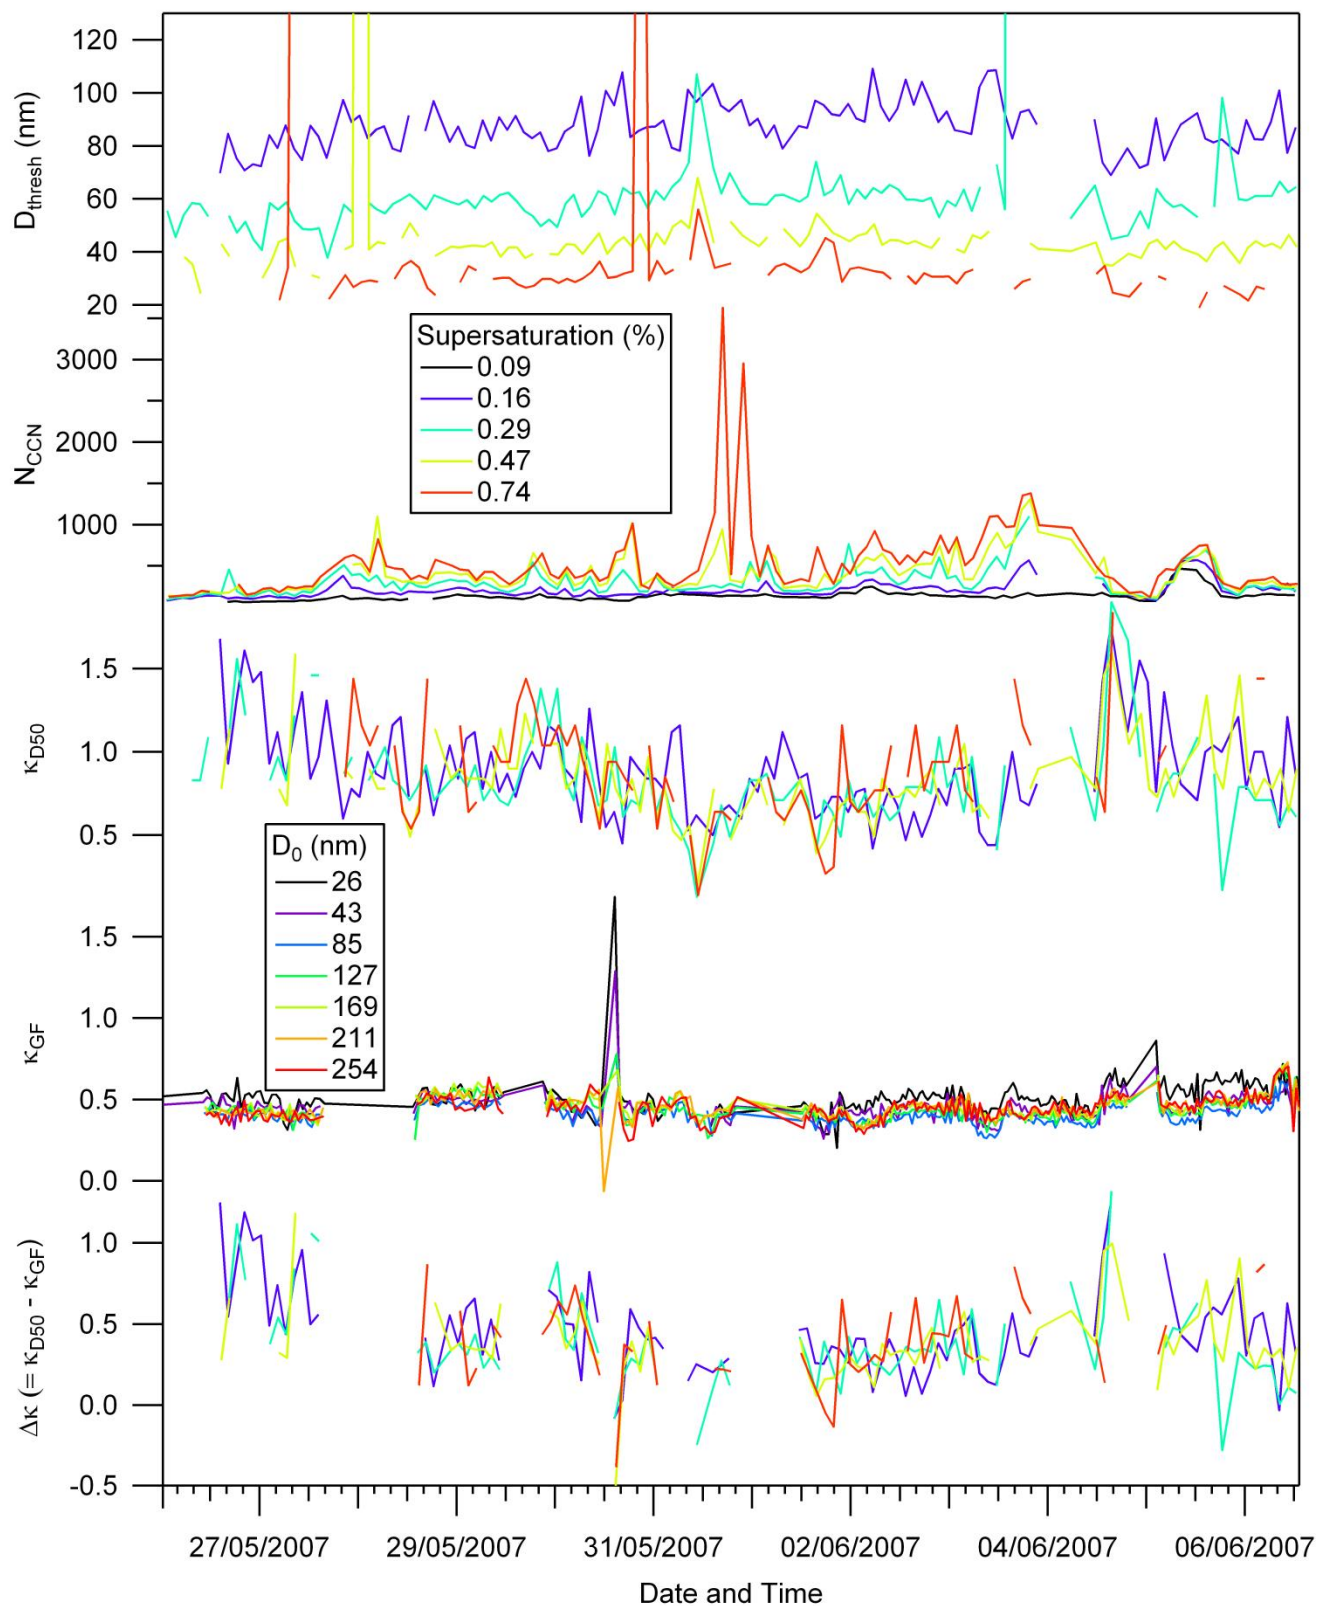

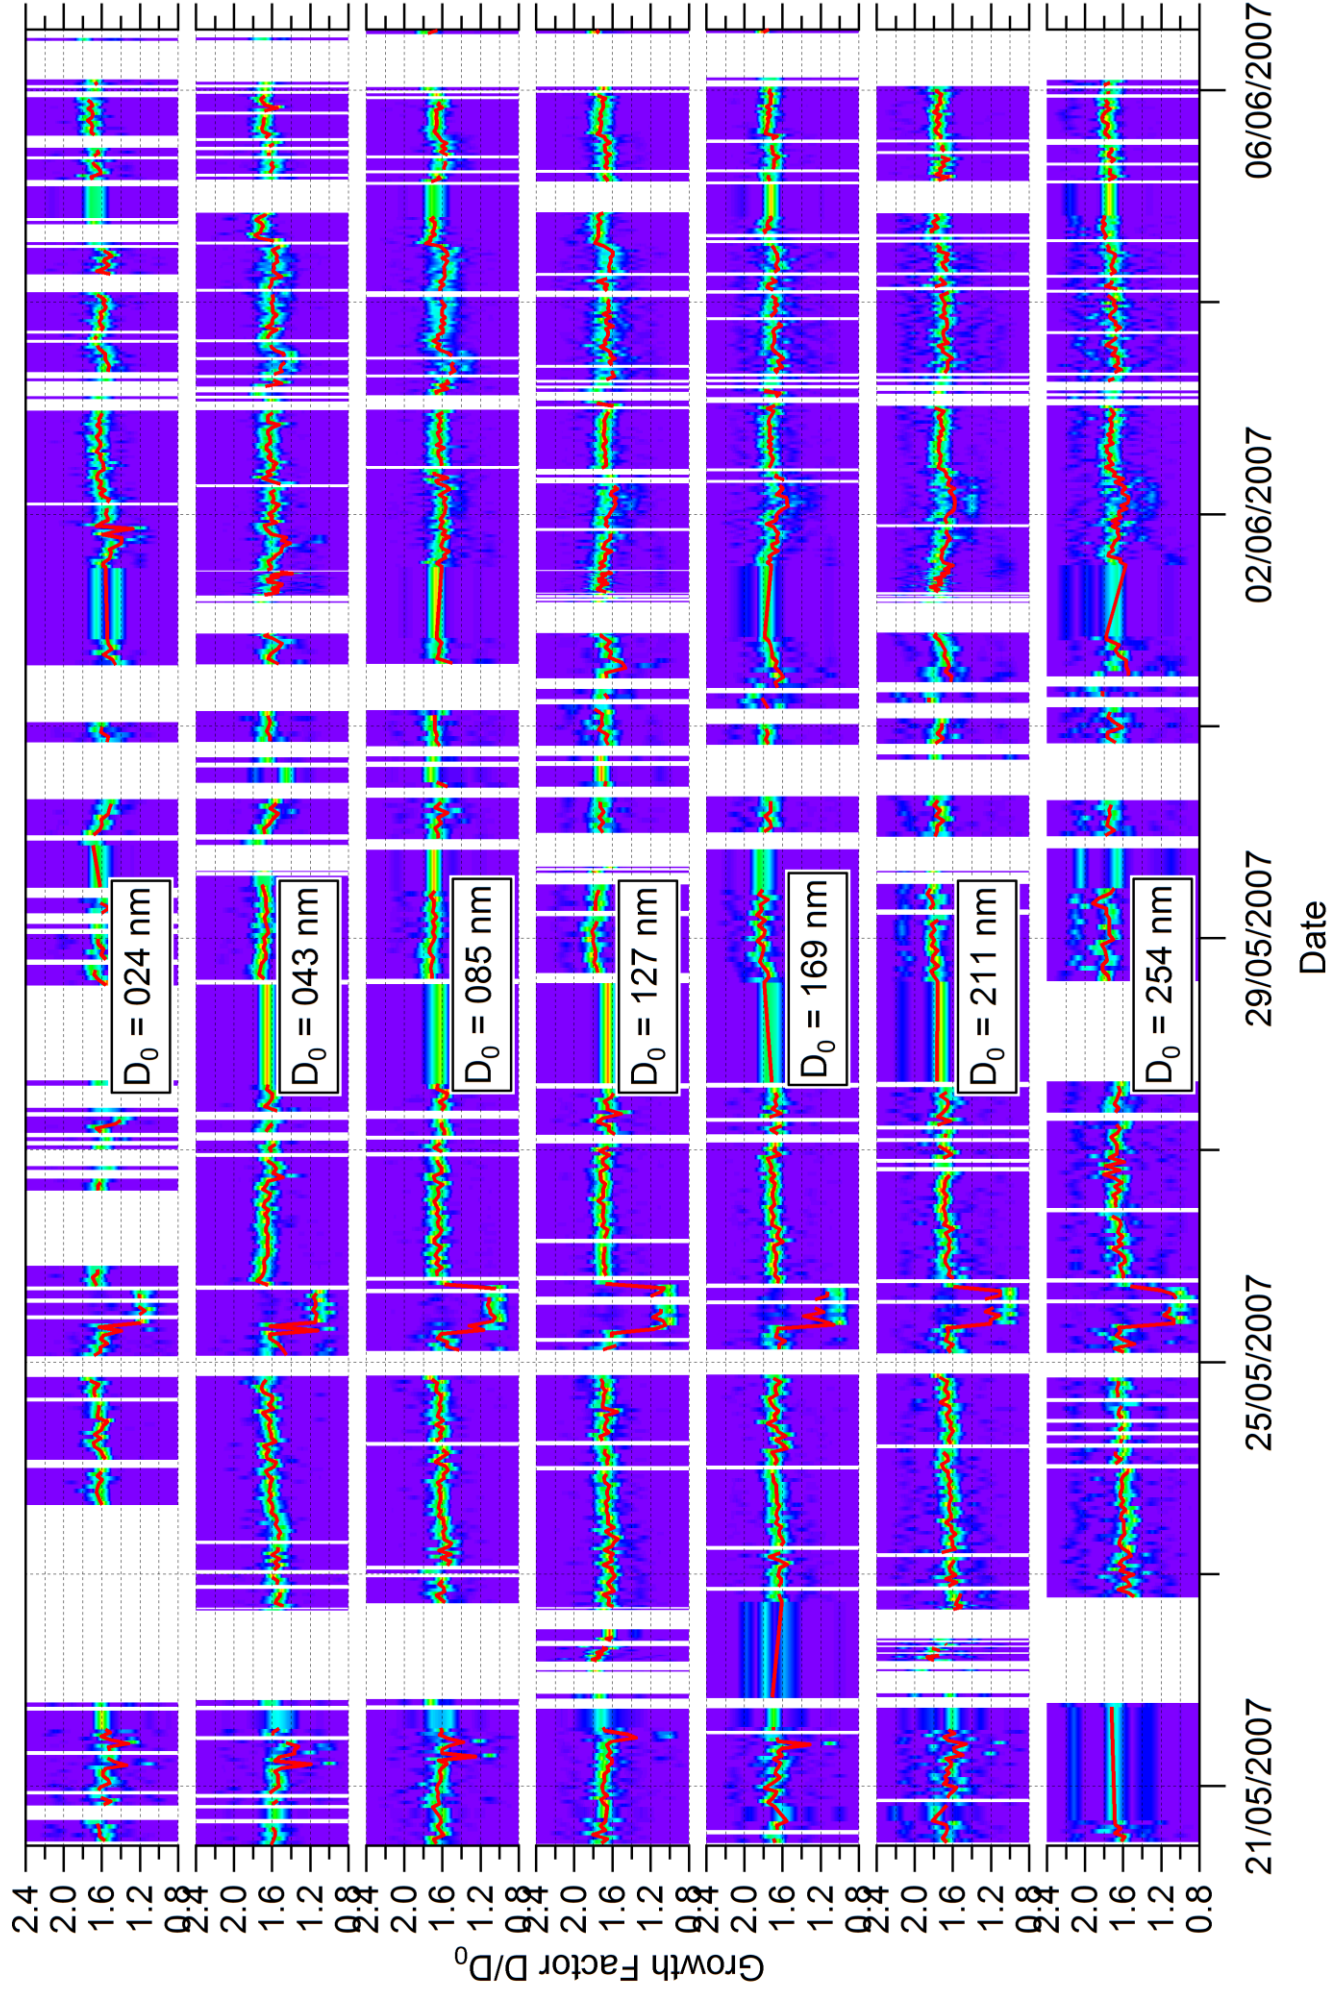

Supplement: Supplementary file 7 [file acp-14-11833-2014-supplement.zip]

# London (ClearfLo) Winter

No  
Polydisperse  
Data

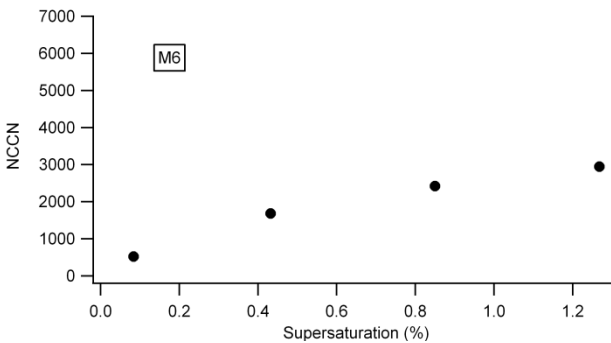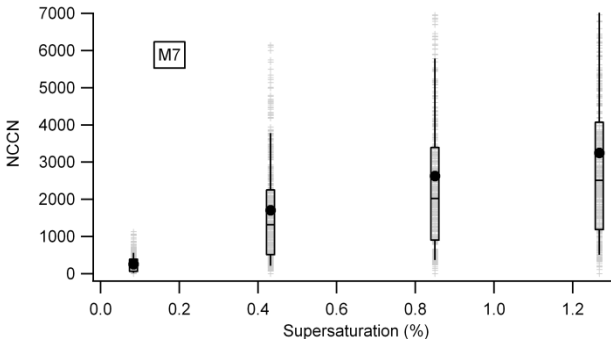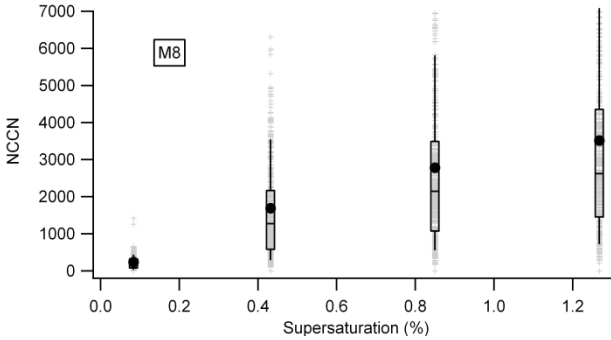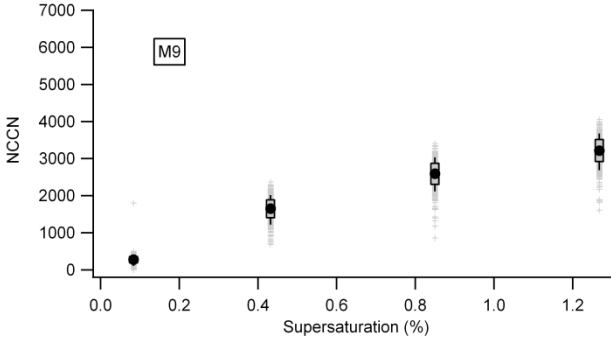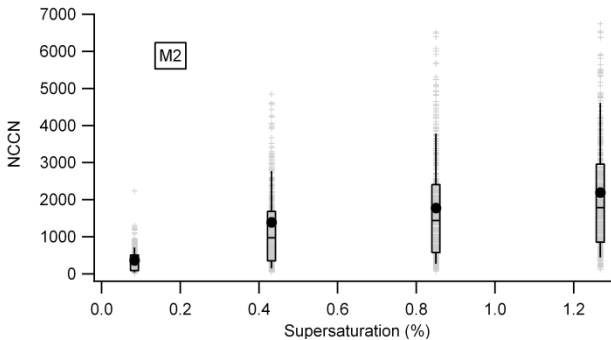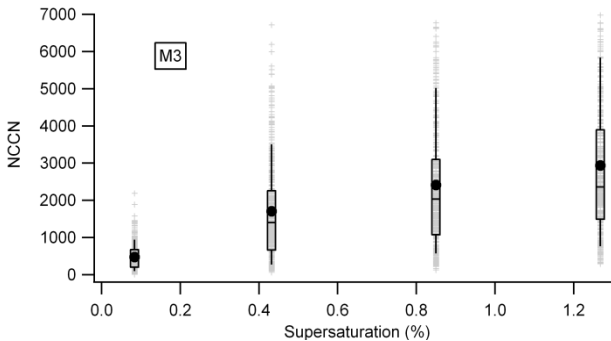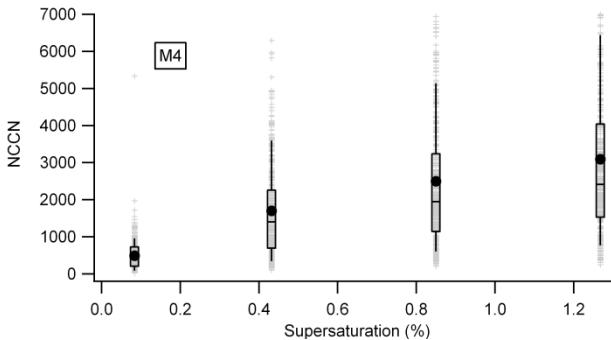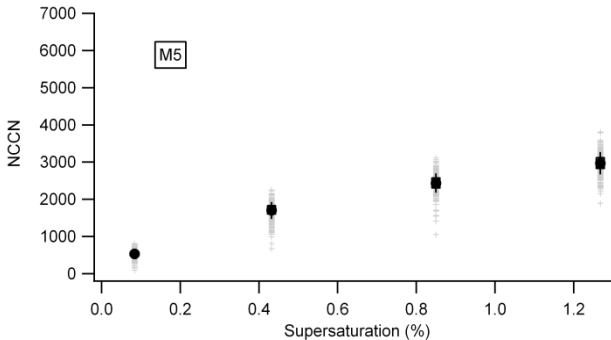

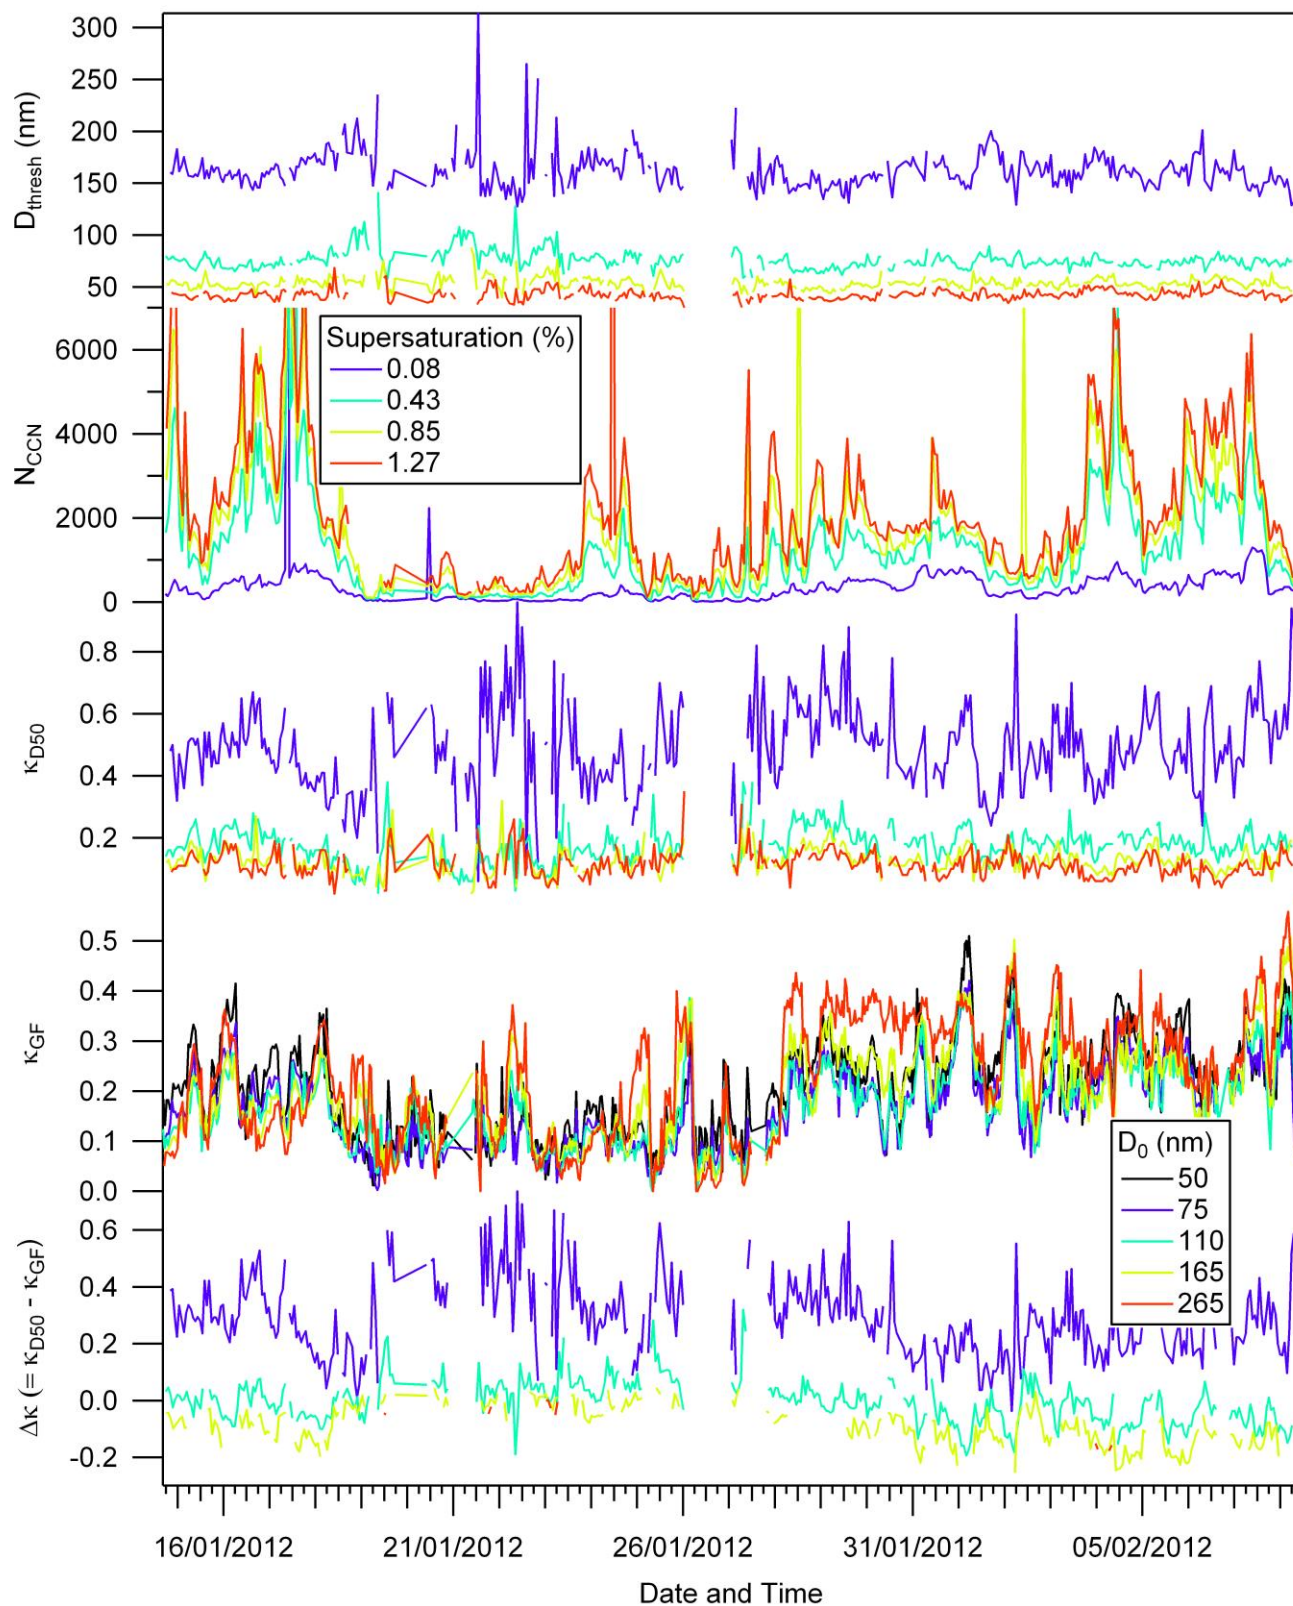



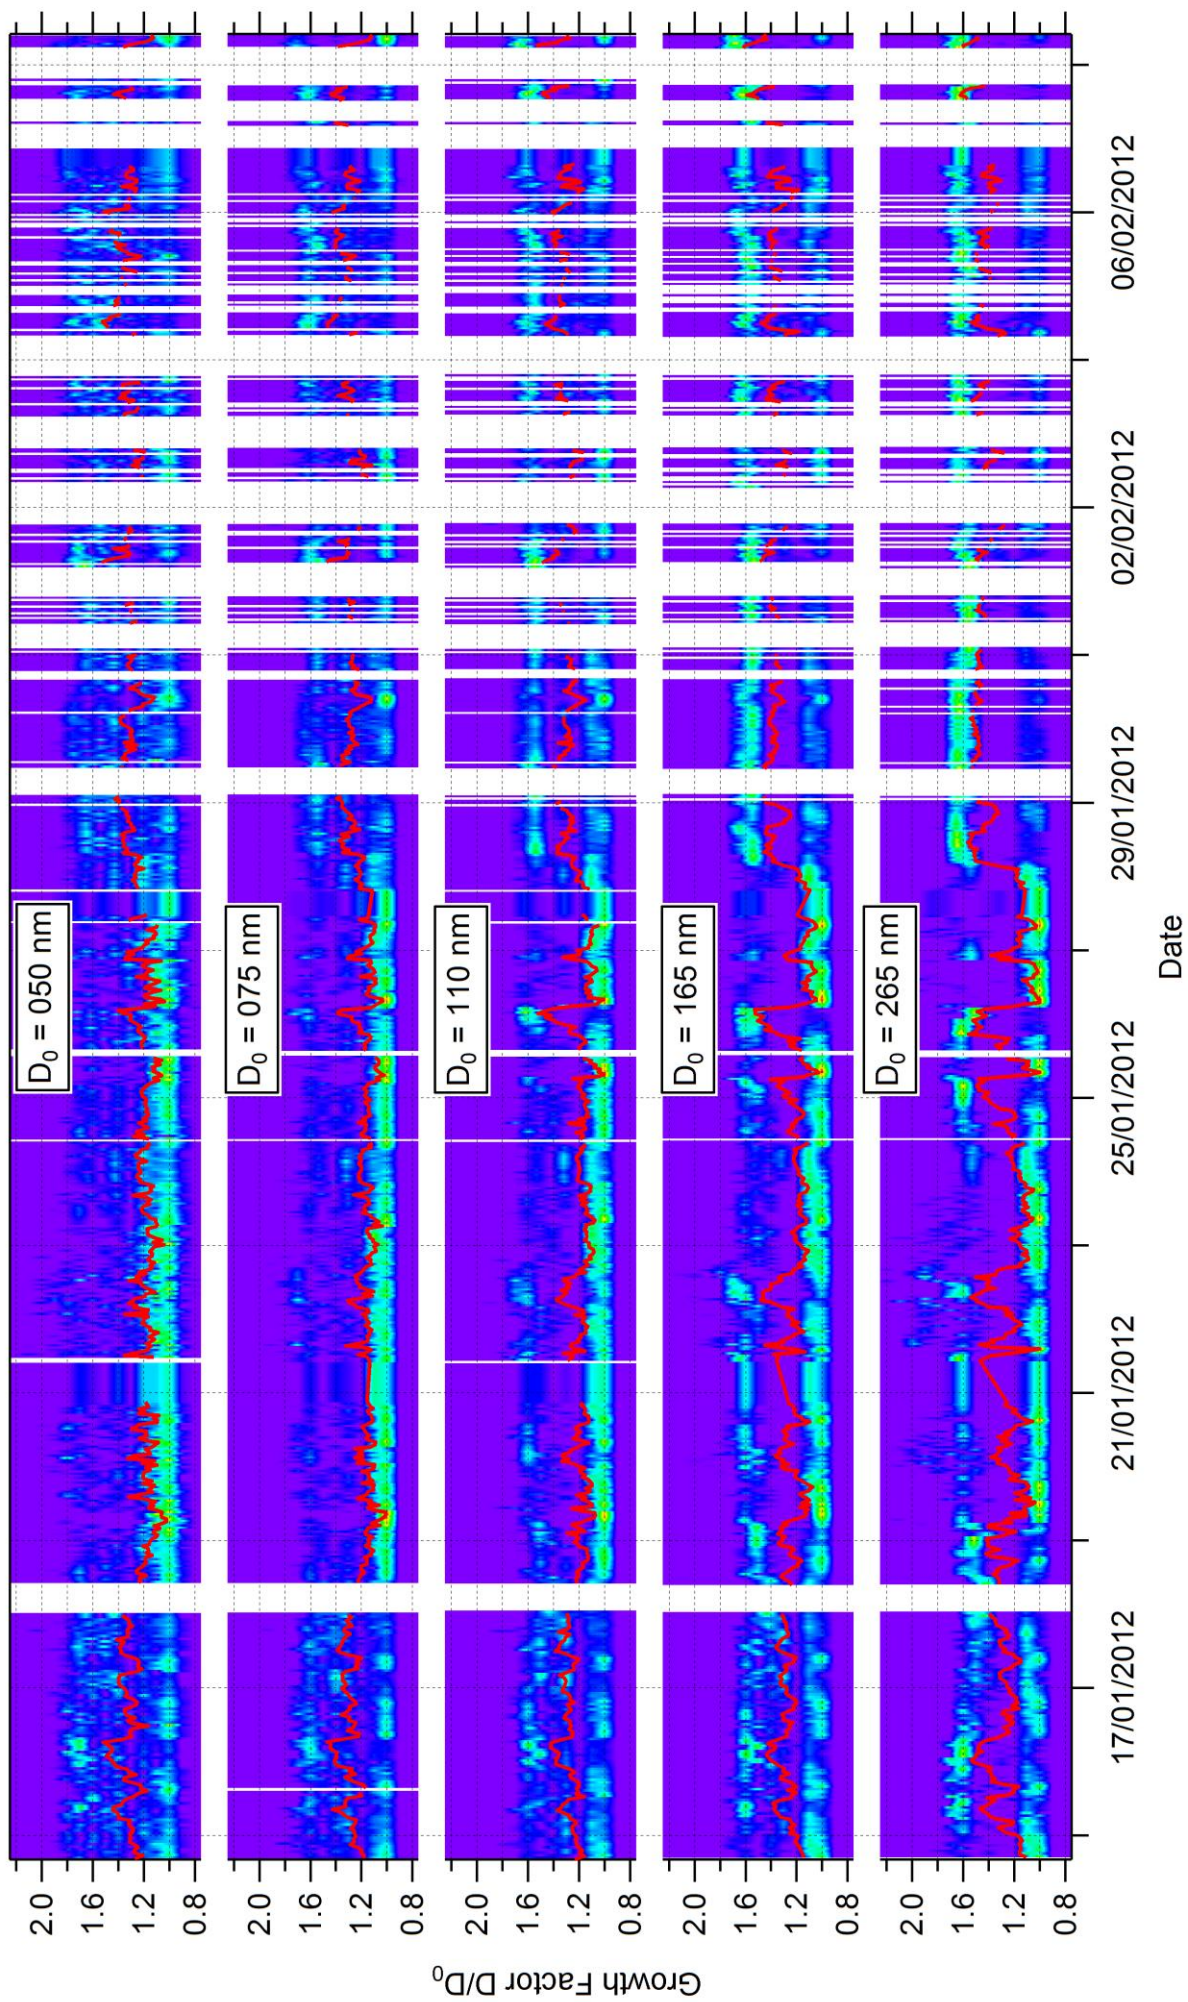

Supplement: Supplementary file 8 [file acp-14-11833-2014-supplement.zip]

# Amazonia (BUNIAACIC)

No  
Polydisperse  
Data

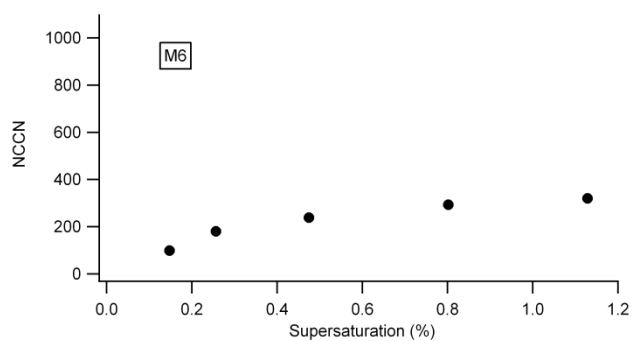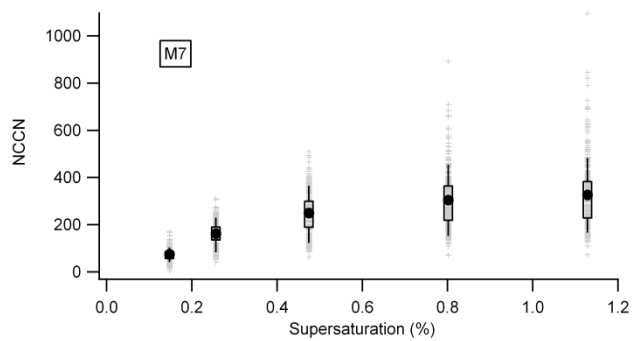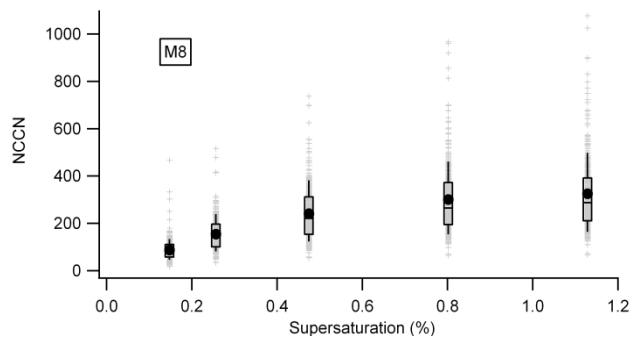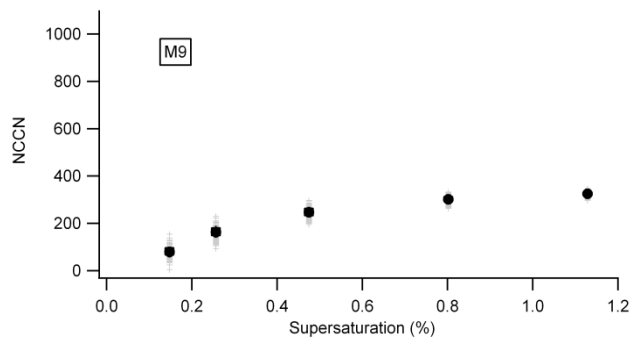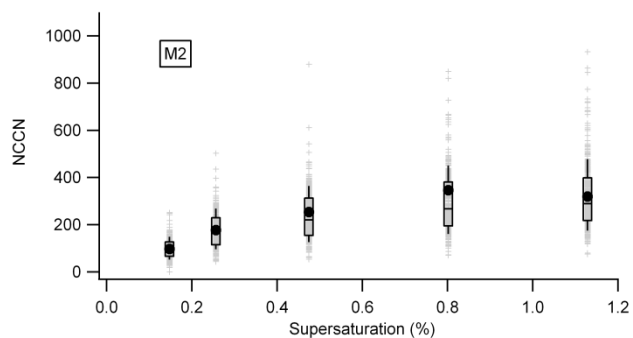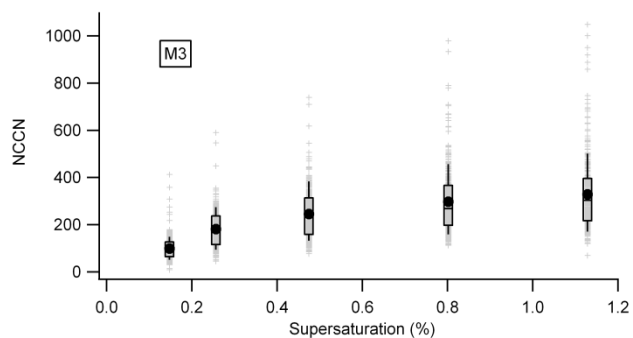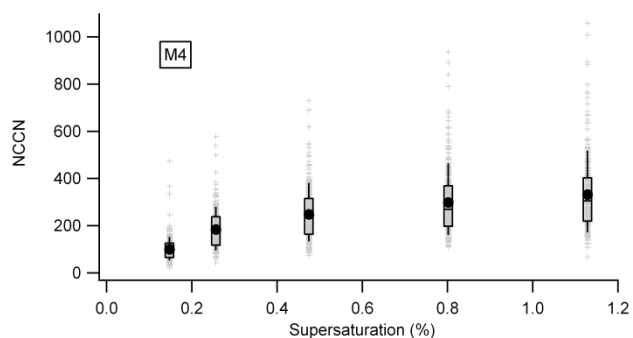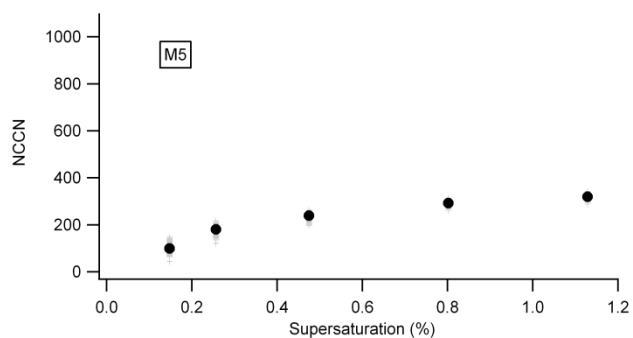

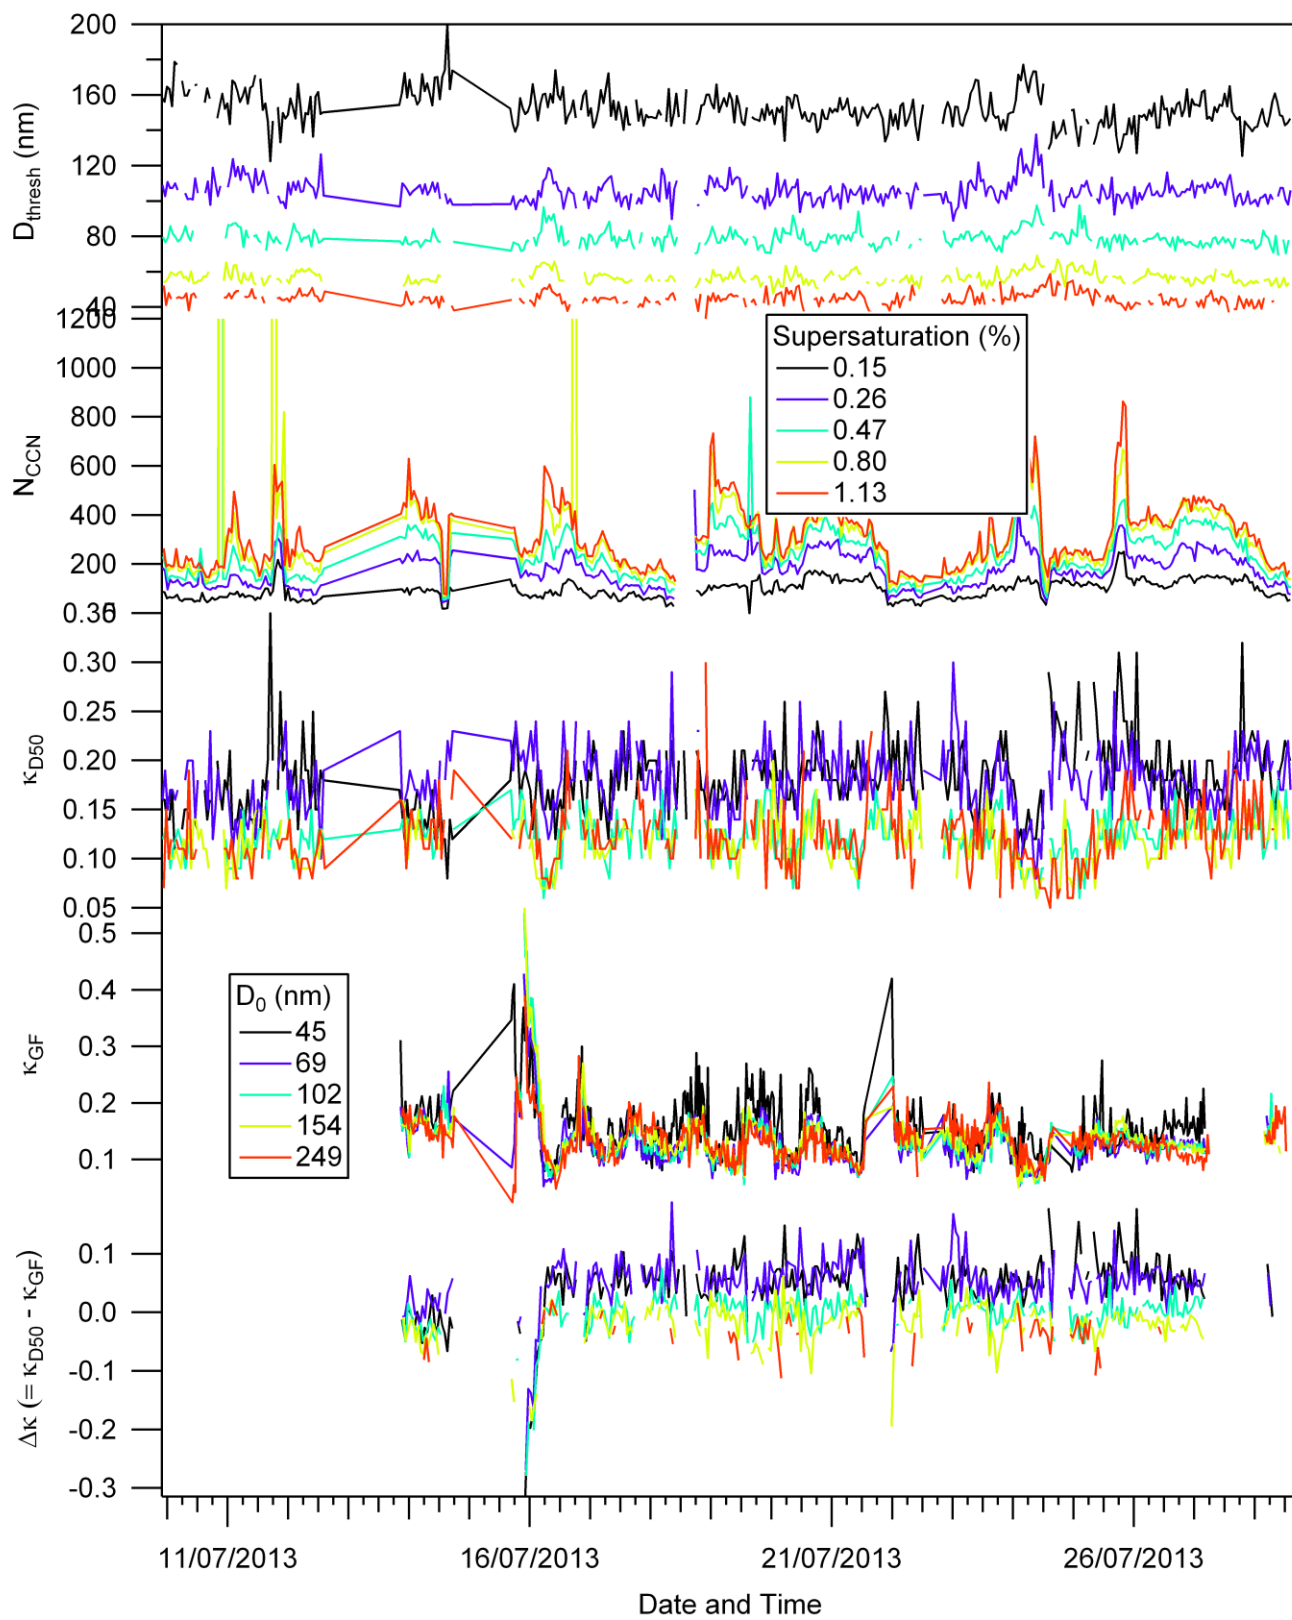

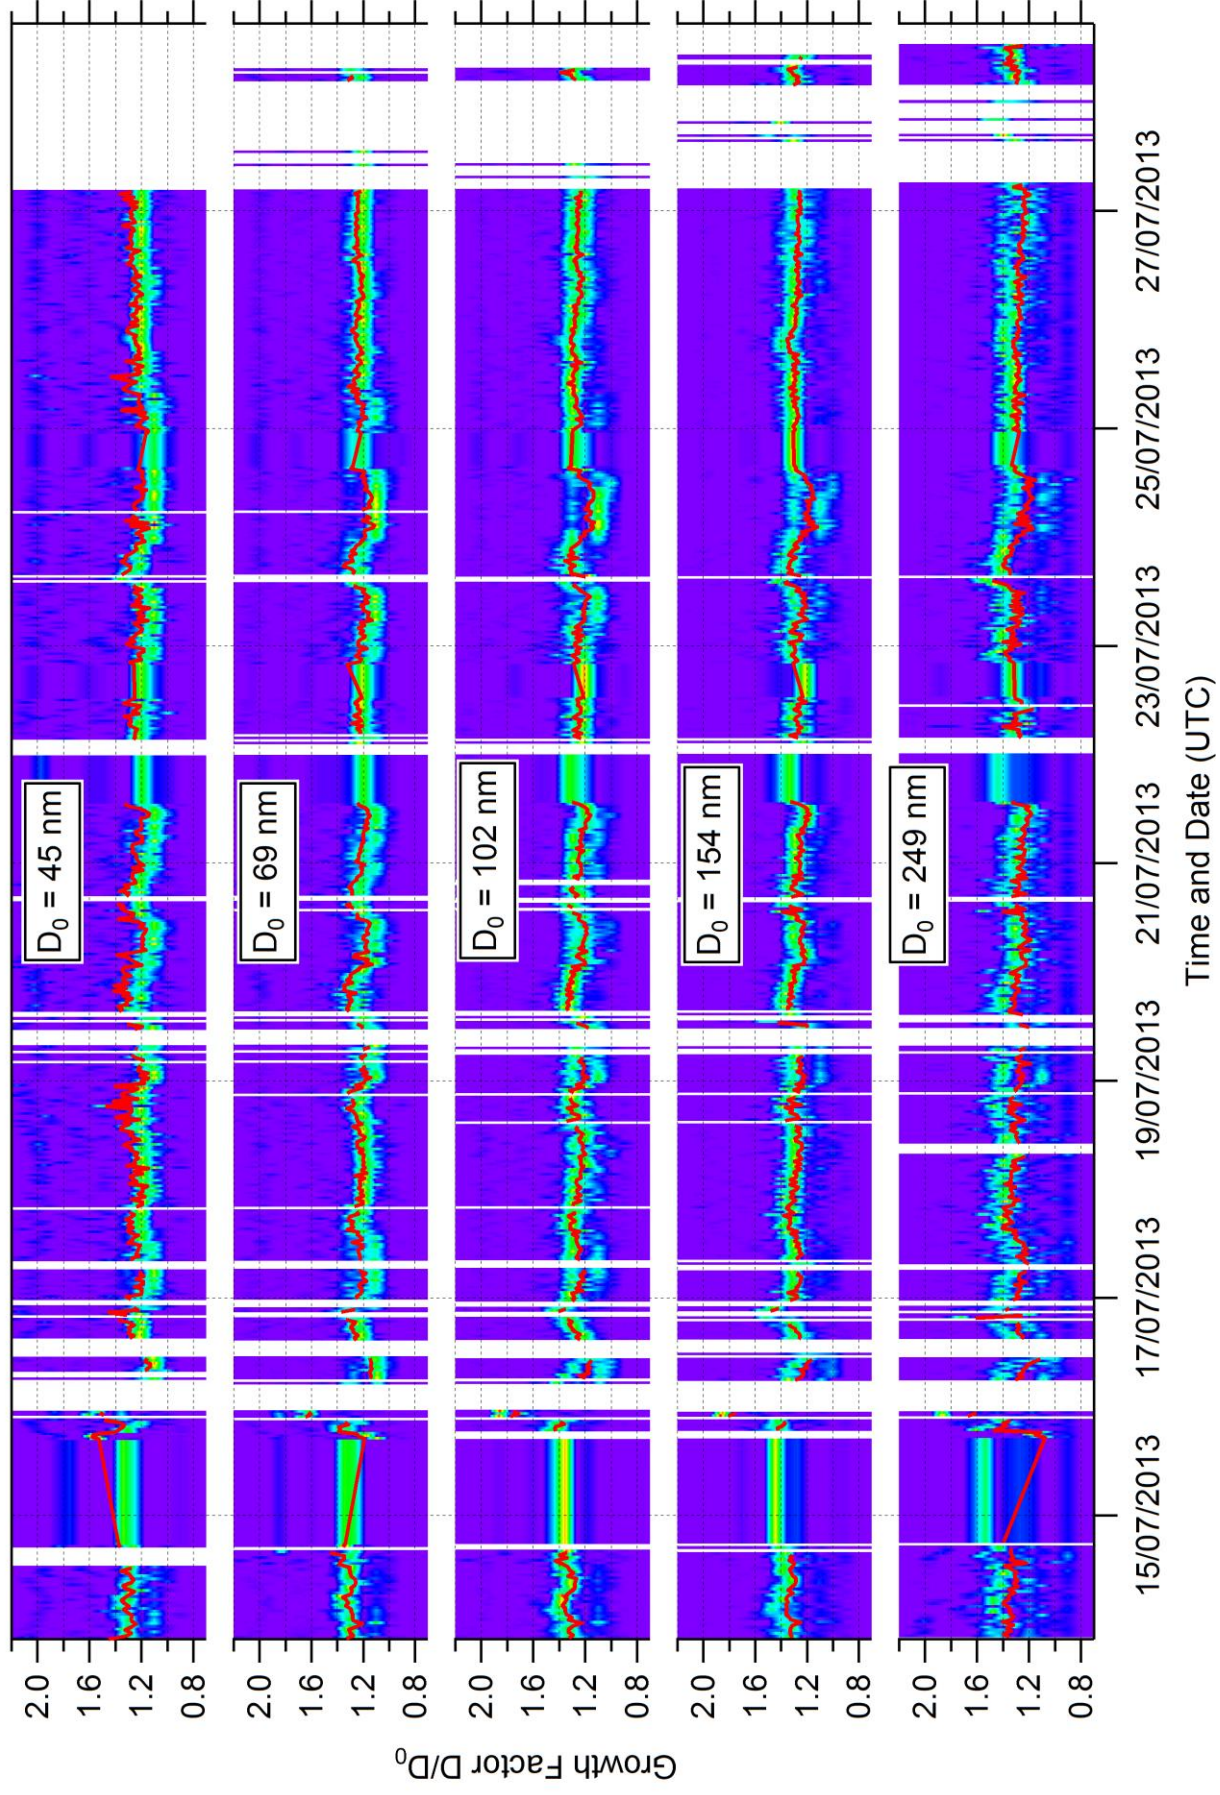

Supplement: Supplementary file 10 [file acp-14-11833-2014-supplement.zip]

# Chilbolton (APPRAISE)

No  
Polydisperse  
Data

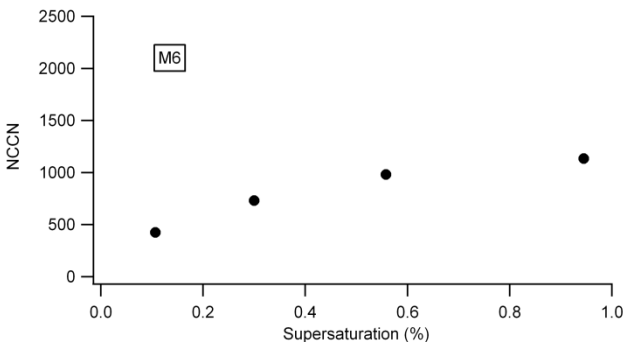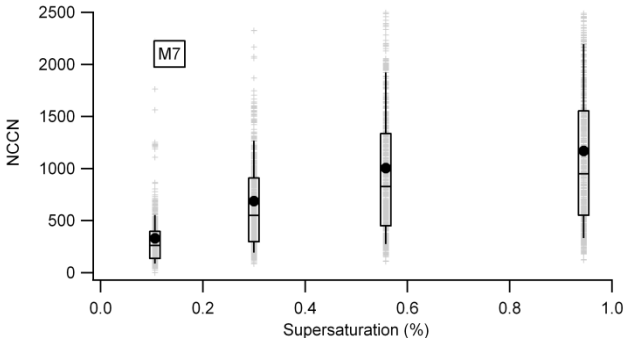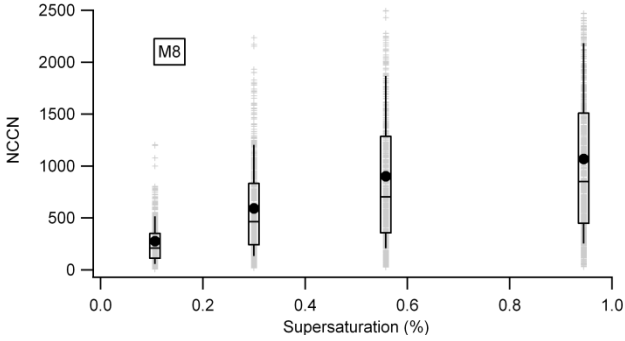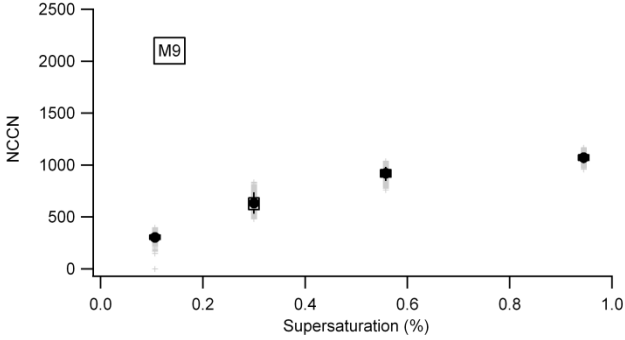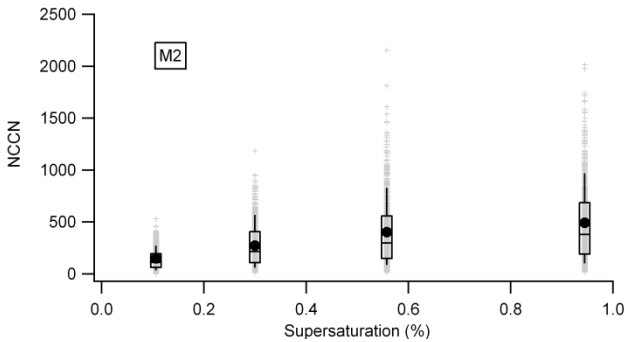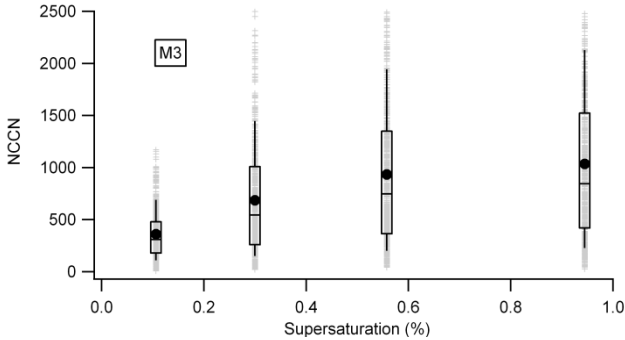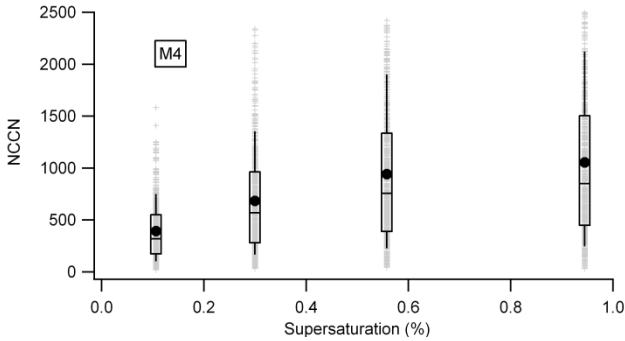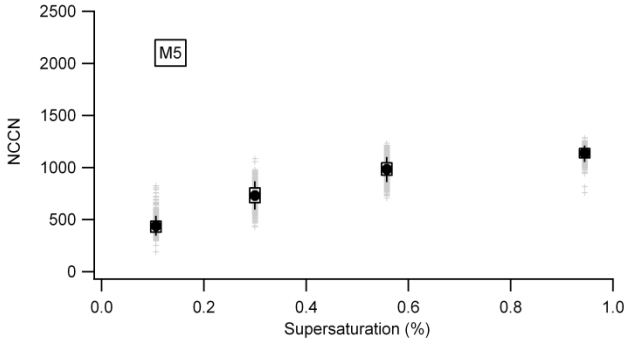

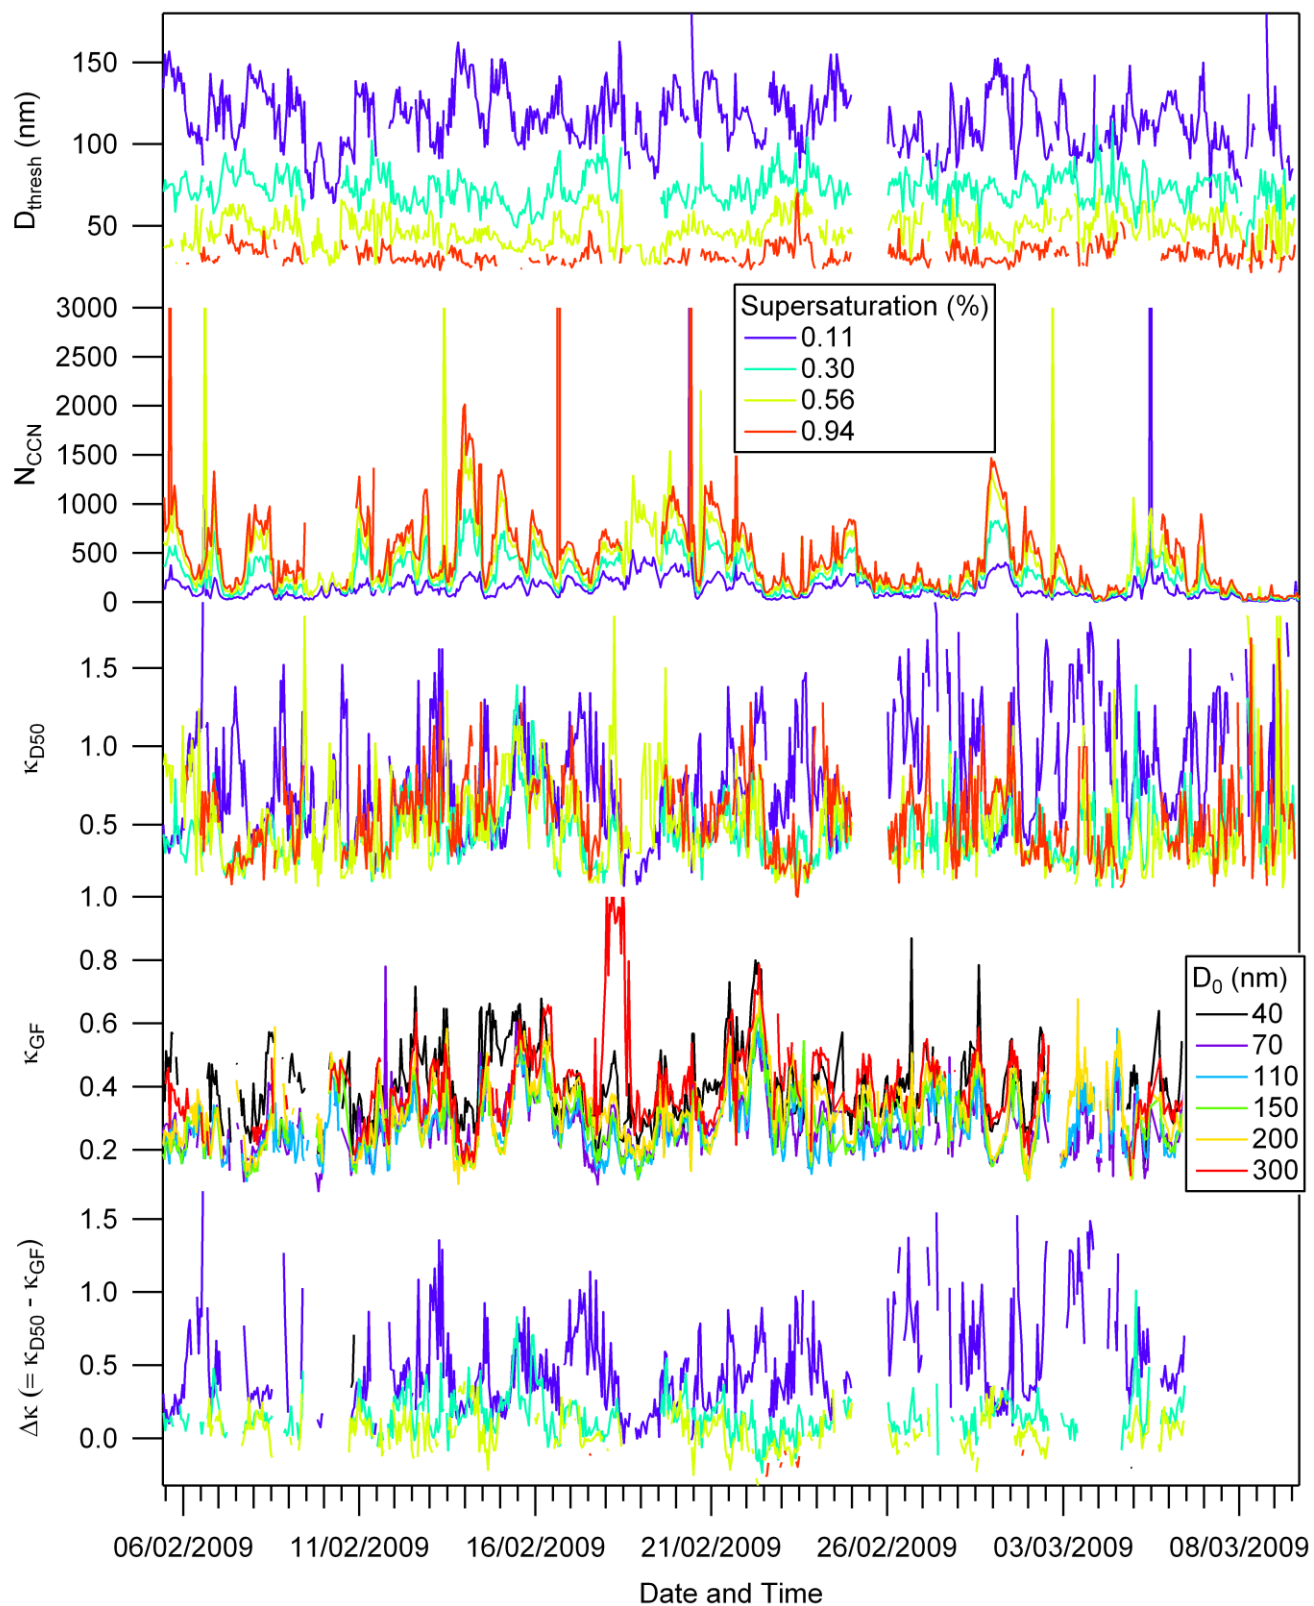

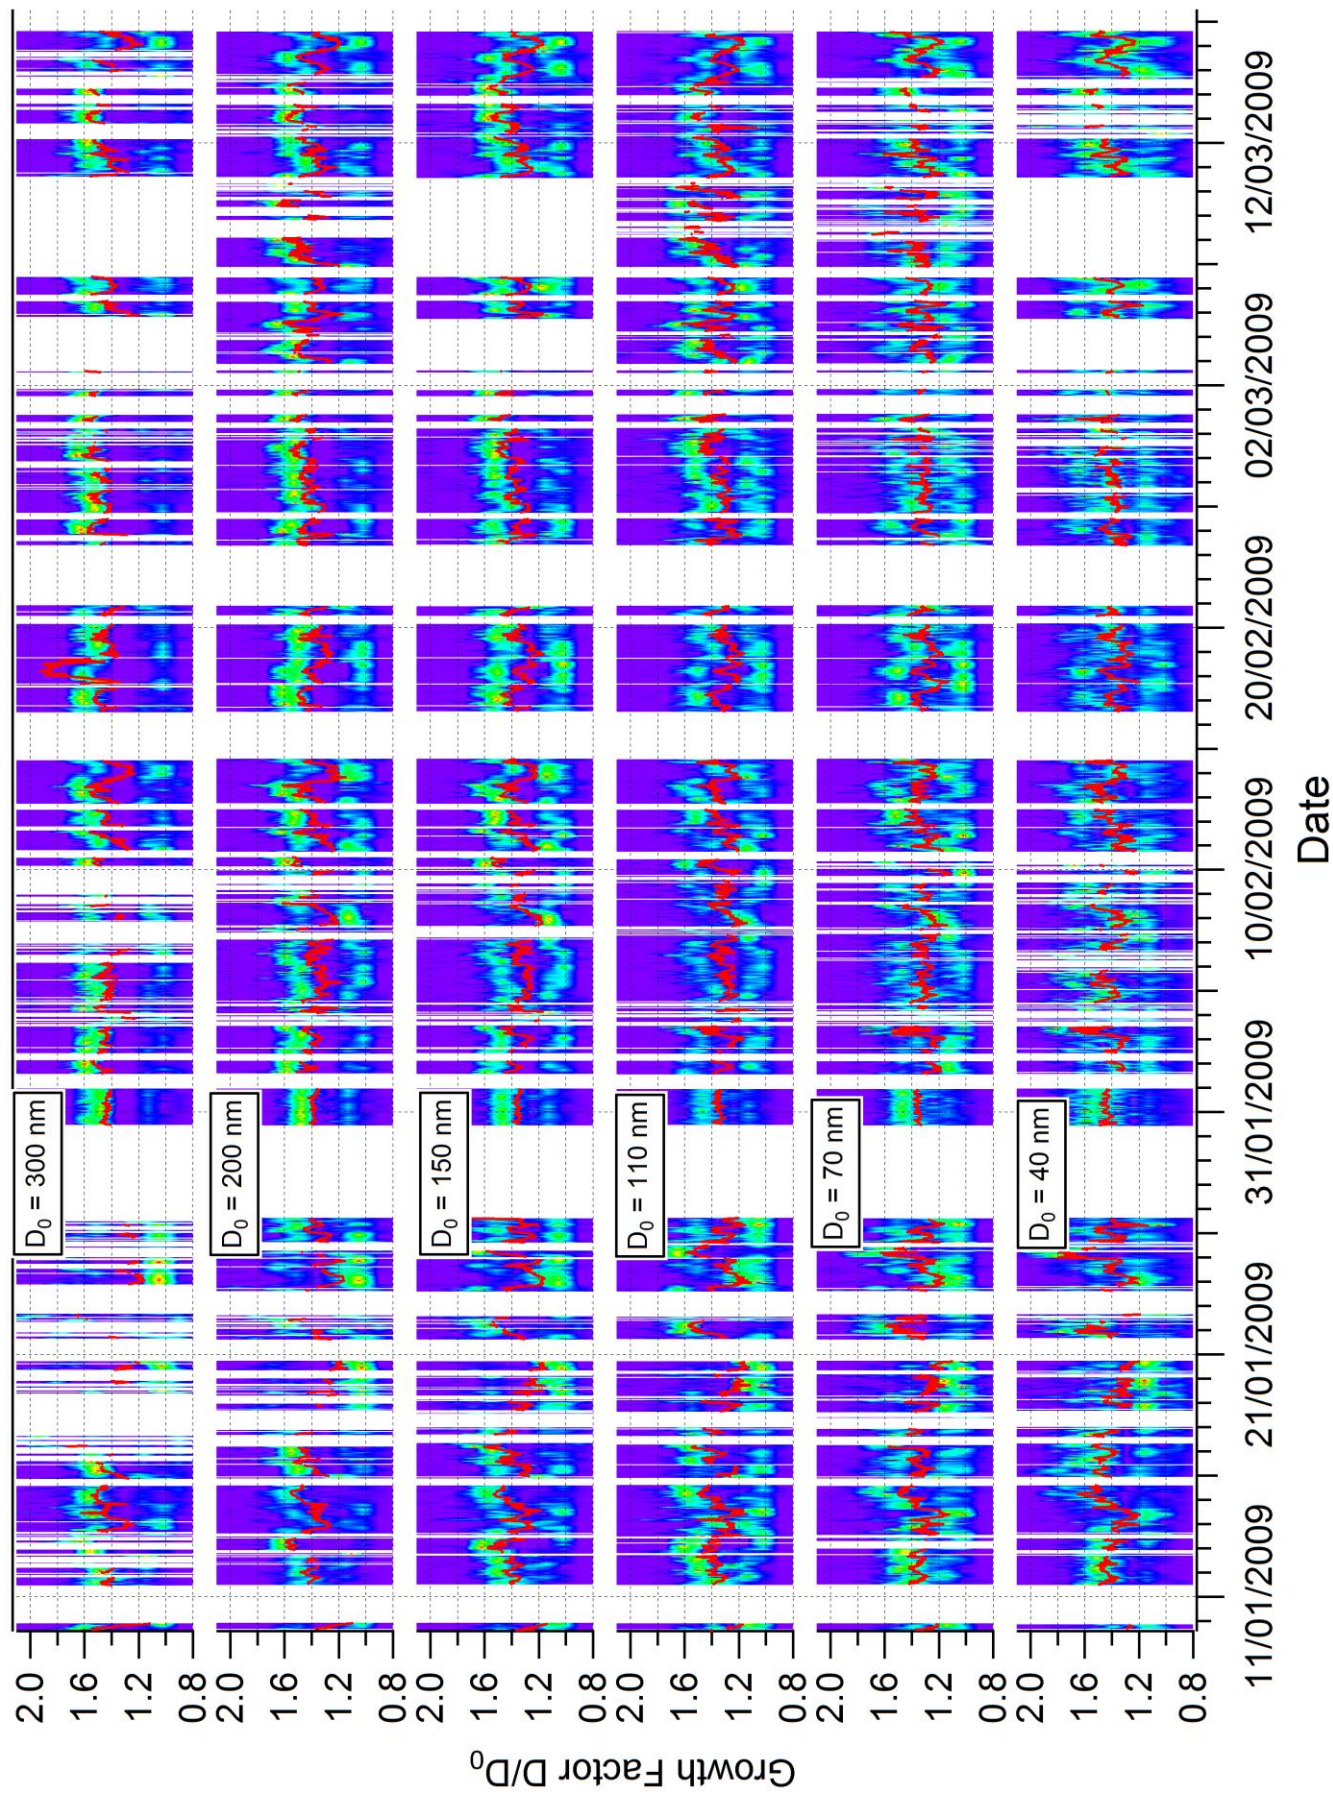

Supplement: Supplementary file 11 [file acp-14-11833-2014-supplement.zip]

# Borneo (OP3)

No  
Polydisperse  
Data

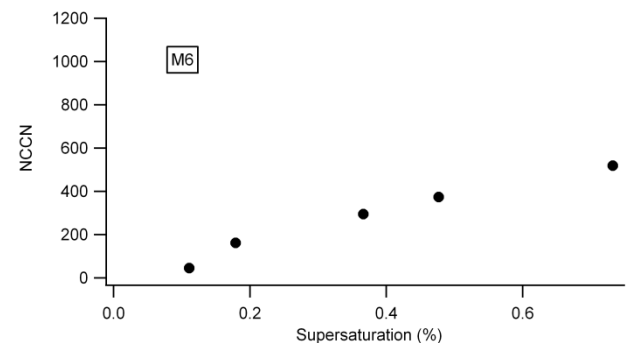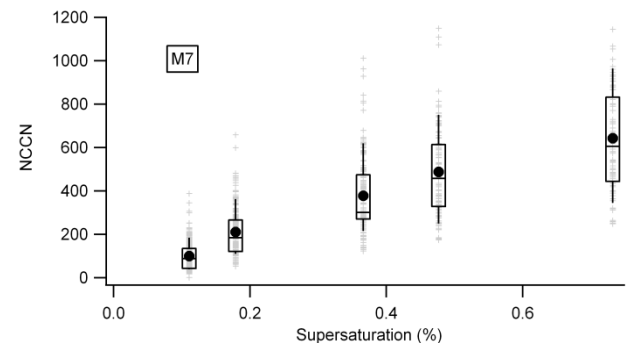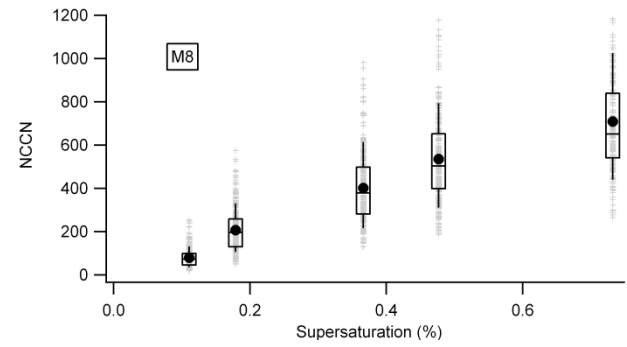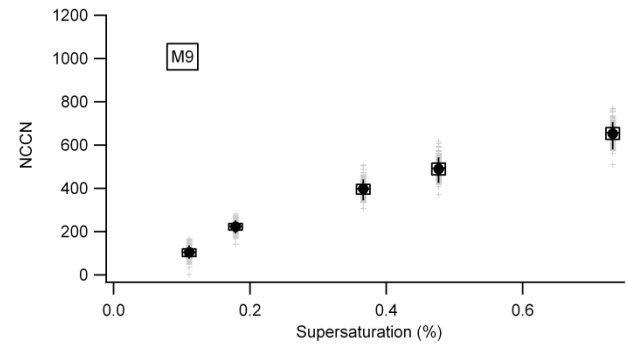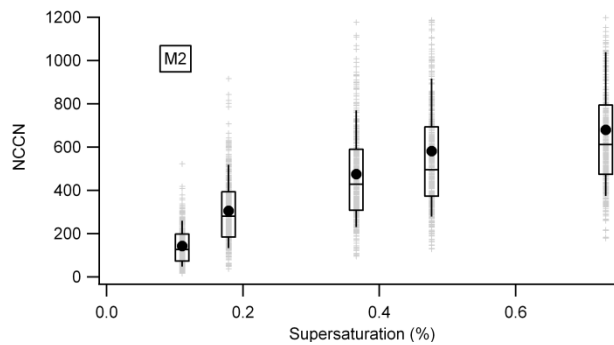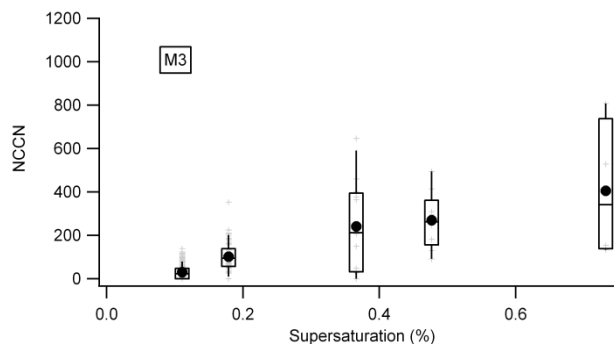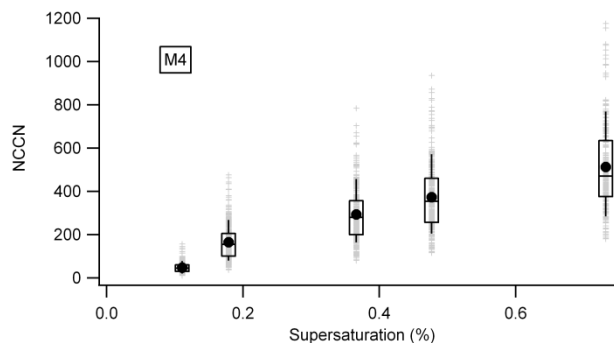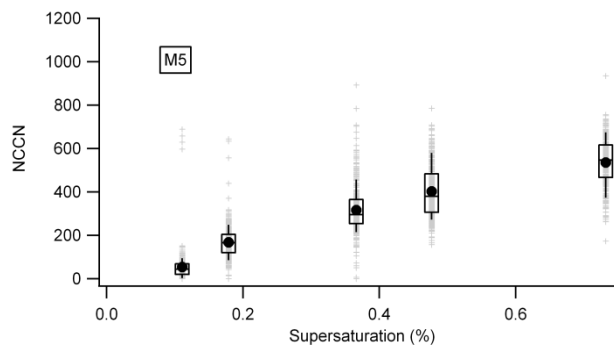

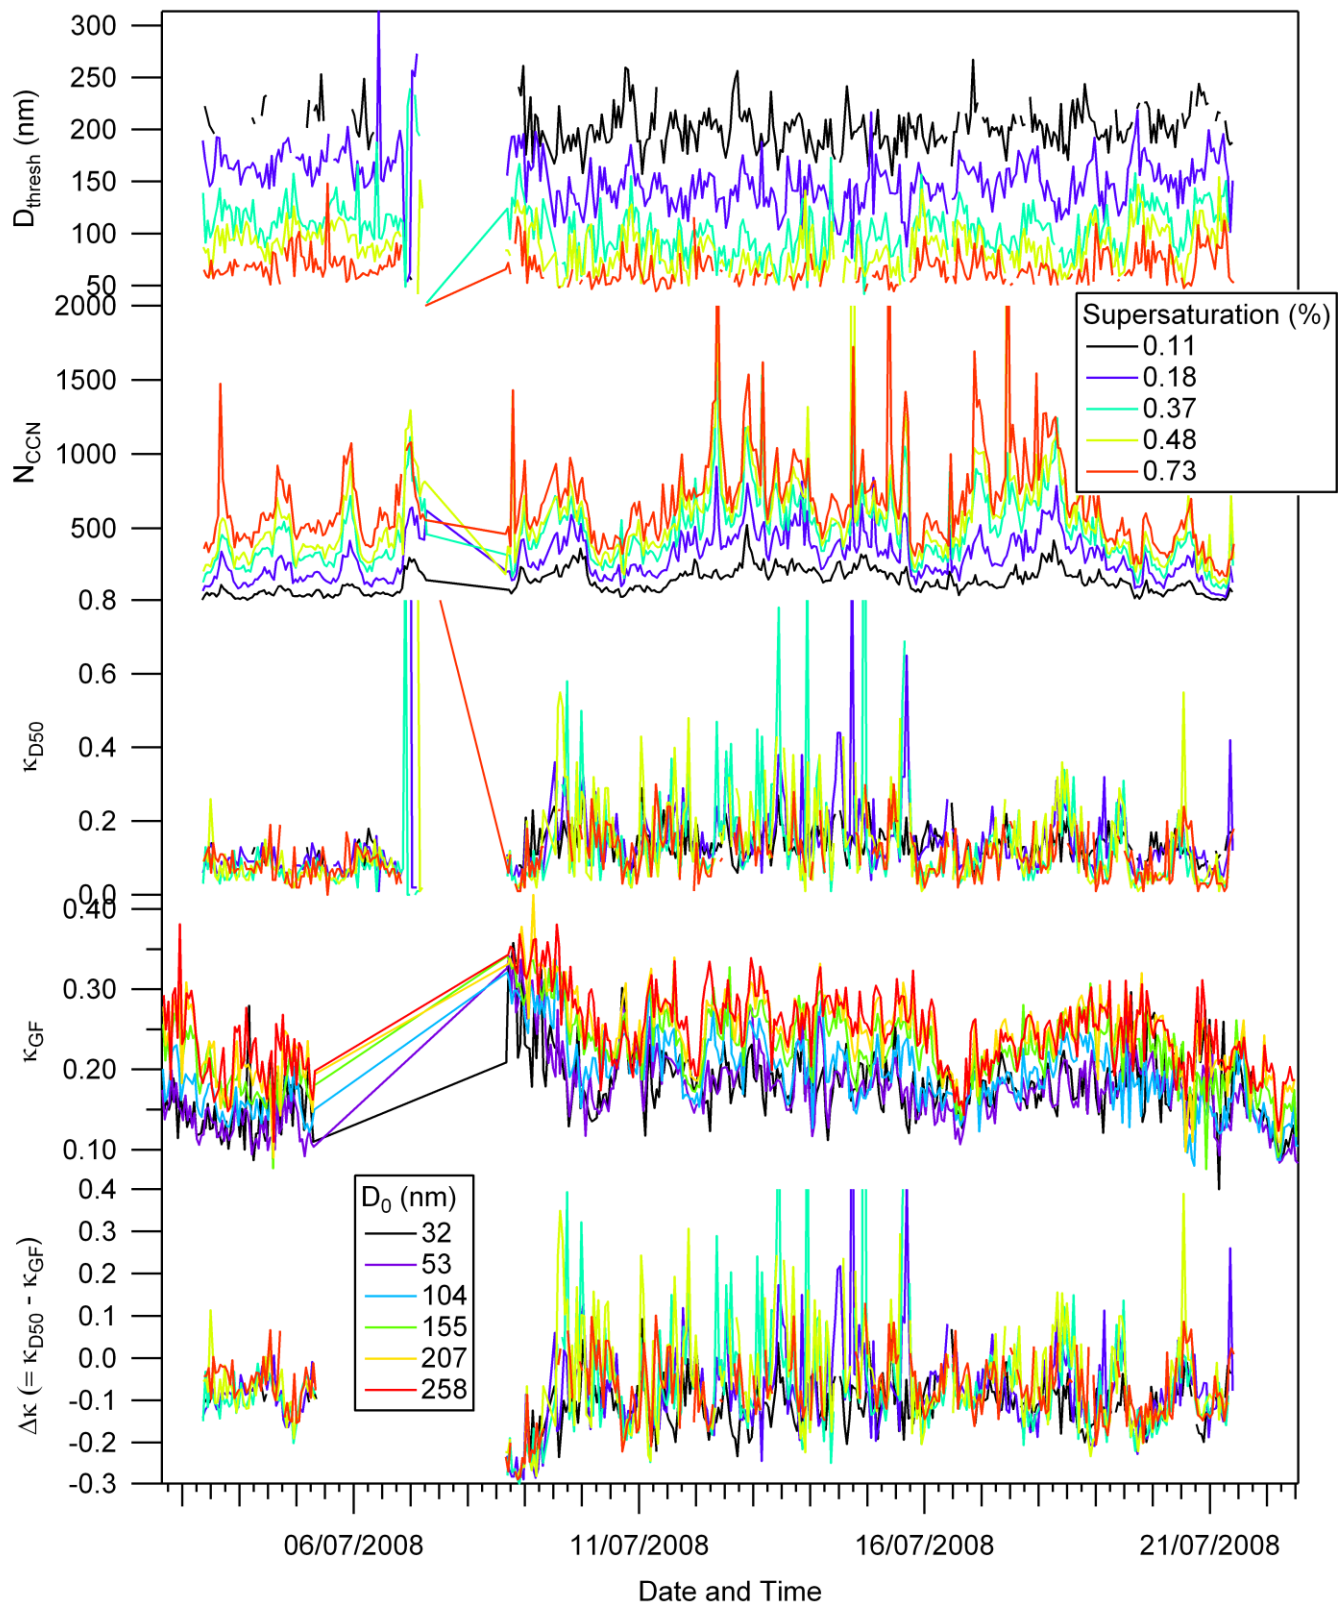



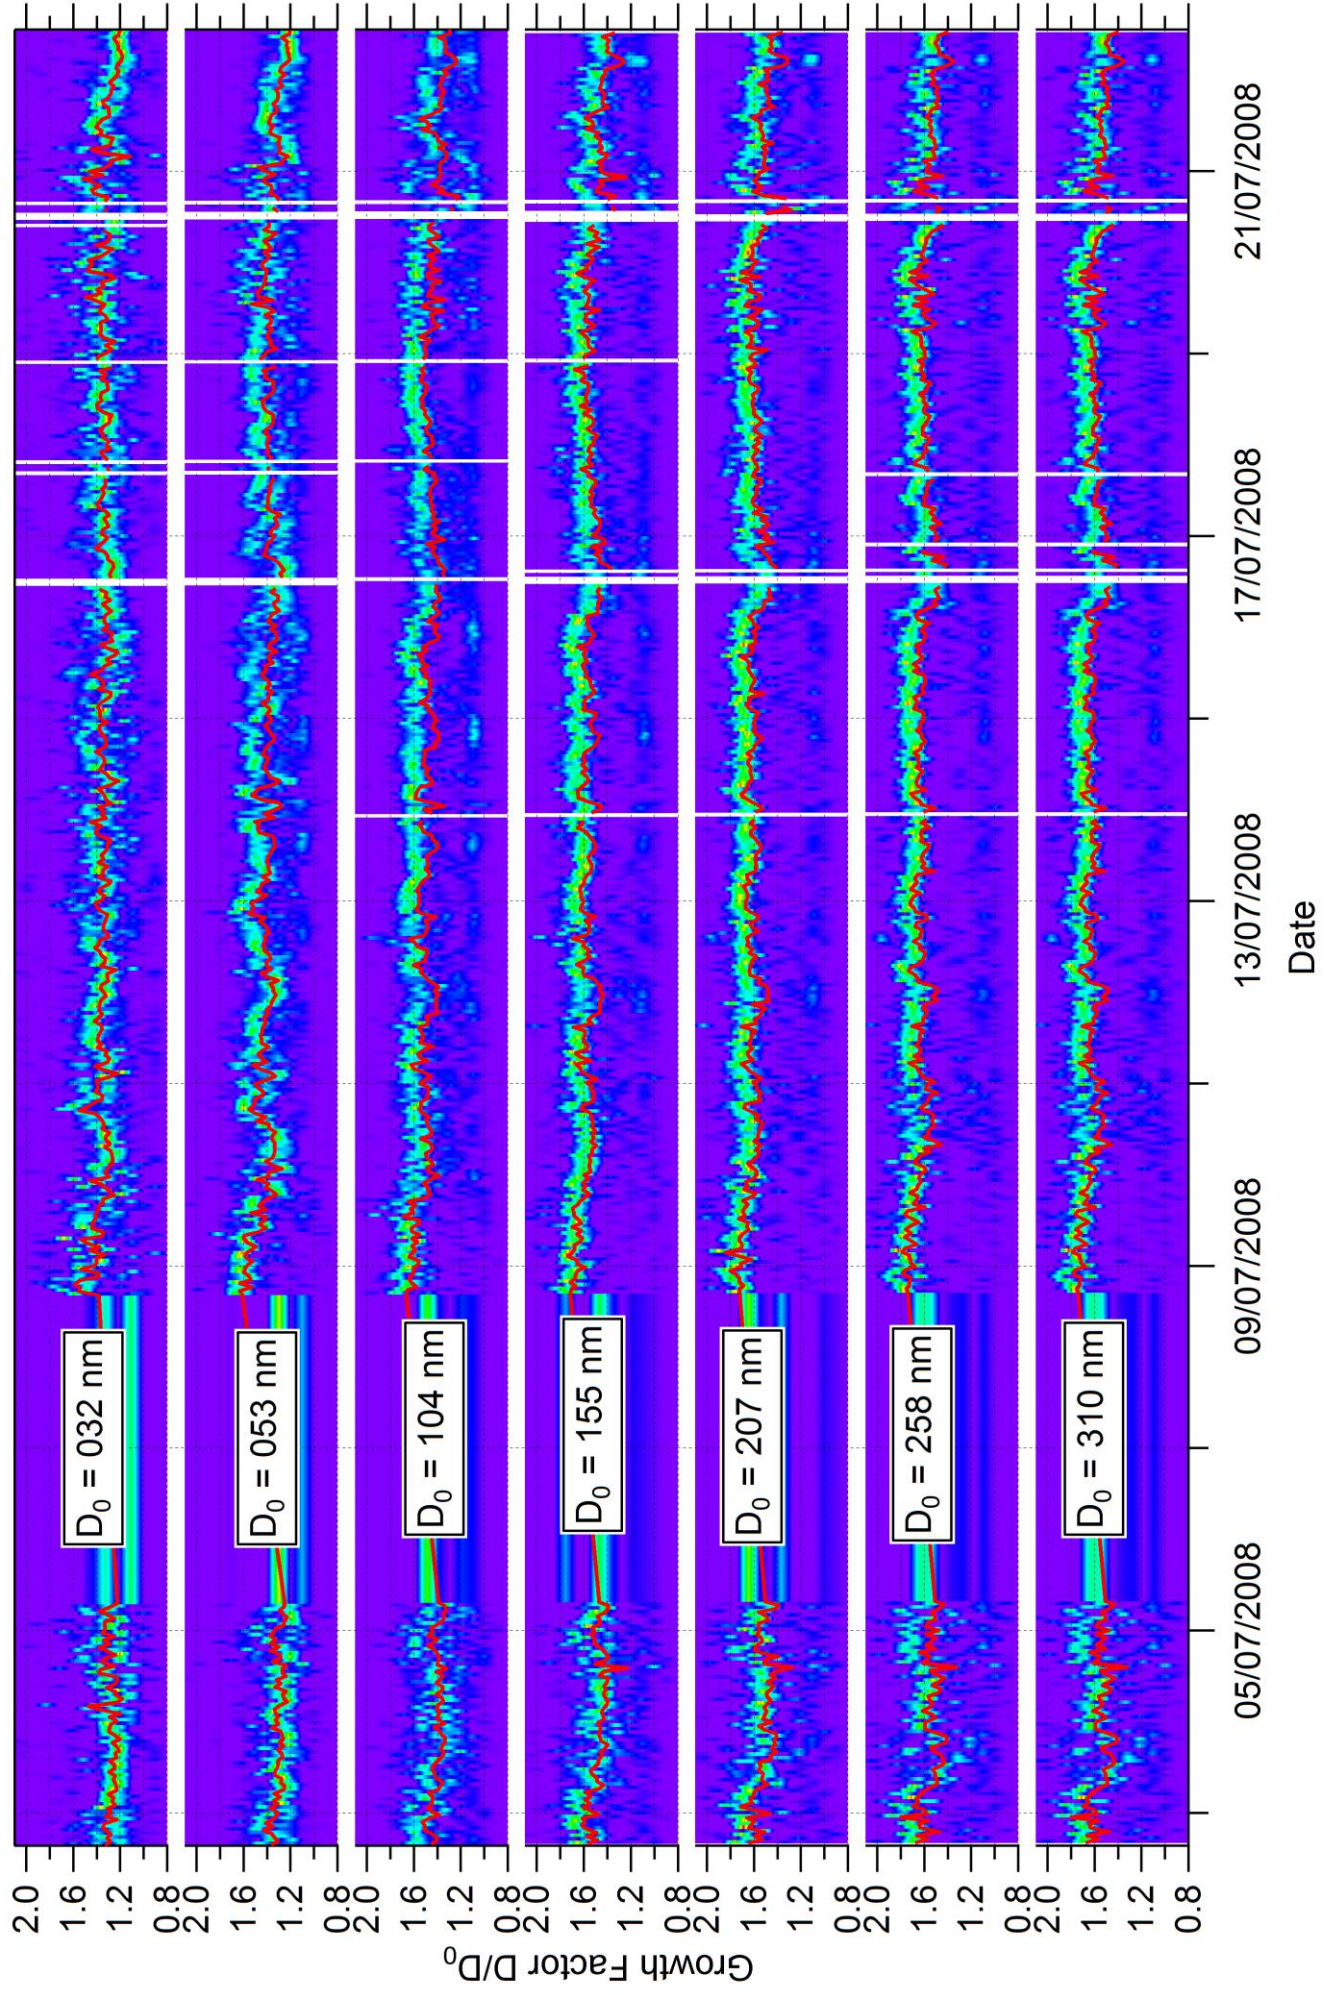

Supplement: Supplementary file 13 [file acp-14-11833-2014-supplement.zip]
